# Supplementary material for: An expedient approach to the total synthesis of (+)-5-epi-eudesm-4(15)-ene-1β,6β-diol
Source: Royal Society of Chemistry journal article supplement (doi:10.1039/c2cc36260k), 2012-01-01
Supplement: c2cc36260k.pdf [file c2cc36260k.pdf]

# An expedient approach to the total synthesis of (+)-5-*epi*-eudesma-4(15)-ene-1 $\beta$ ,6 $\beta$ -diol

Gowrisankar Parthasarathy, Céline Besnard and E. Peter Kundig\*

*Department of Organic Chemistry, University of Geneva  
30 Quai Ernest Ansermet, 1211, Geneva 4, Switzerland*

E-mail : [Peter.Kundig@unige.ch](mailto:Peter.Kundig@unige.ch)

## Supplementary Information

| <b>CONTENTS:</b>                                          | page |
|-----------------------------------------------------------|------|
| 1. <b>General</b> .....                                   | S2   |
| 2. <b>Experimental procedures</b> .....                   | S3   |
| 3. <b>Spectroscopic data</b> .....                        | S14  |
| 4. <b>Comparison table of characterization data</b> ..... | S30  |

## 1. General

Unless otherwise indicated, all reactions were carried out under a positive pressure of nitrogen and with oven-dried glassware using standard Schlenk techniques. Infrared spectra (IR) were recorded on a Perkin-Elmer FT-IR spectrometer (diamond ATR Golden Gate sampling).  $^1\text{H}$  NMR and  $^{13}\text{C}$  NMR spectra were recorded on Bruker AMX 300 ( $^1\text{H}$ , 300 MHz;  $^{13}\text{C}$ , 75 MHz), 400 ( $^1\text{H}$ , 400 MHz;  $^{13}\text{C}$ , 100 MHz) or 500 ( $^1\text{H}$ , 500 MHz;  $^{13}\text{C}$ , 125 MHz) spectrometers in the solvent indicated. Chemical shifts are reported in parts per million (ppm) relative to internal standard (tetramethylsilane,  $\delta_{\text{H}} = 0.00$ ;  $\text{CDCl}_3$ ,  $\delta_{\text{H}} = 7.26$ ). Data are presented as follows: chemical shift ( $\delta$ , ppm), integration, multiplicity (s = singlet, d = doublet, t = triplet, q = quadruplet, m = multiplet, br = broad), coupling constant (reported in Hz), assignment.  $^{13}\text{C}$  NMR chemical shifts are reported in parts per million (ppm) relative to internal standard (tetramethylsilane,  $\delta_{\text{C}} = 0.00$ ;  $\text{CDCl}_3$ ,  $\delta_{\text{C}} = 77.00$ ). Electron impact (EI) mass spectra were obtained using Varian CH-4 or SM-1 instruments operating at 40–70 eV and for Electrospray ionization (ESI) HRMS analyses were measured on a VG analytical 7070E instrument. Melting points were determined on a Büchi 540 spectrometer and are uncorrected. Electron impact (EI) mass spectra were obtained using Varian CH-4 or SM-1 instruments operating at 40 eV and electrospray (ESI) spectra using an Applied Biosystems API 150EX LC/MS system. Optical rotations were measured at 20 °C on a Perkin Elmer 241 polarimeter using a quartz cell ( $l = 10$  cm) with a Na high-pressure lamp ( $\lambda = 589$ ).

Product purification by flash column chromatography was performed using Brunschwig silica gel 60 Å (32-63 mesh). Analytical thin layer chromatography (TLC) was carried out using Merck commercial aluminium sheets coated (0.2 mm layer thickness) with Kieselgel 60 F<sub>254</sub>, with visualization by ultraviolet.

Solvents (Toluene, THF,  $\text{CH}_2\text{Cl}_2$ , and Et<sub>3</sub>N) were purified by filtration on  $\text{Al}_2\text{O}_3$  drying columns (Solvtek® system). Reactions and manipulations involving organometallic or moisture sensitive compounds were carried out under dry nitrogen and glassware was heated under vacuum prior use.

## 2. Experimental procedures

### Glycolate (-)-**9**

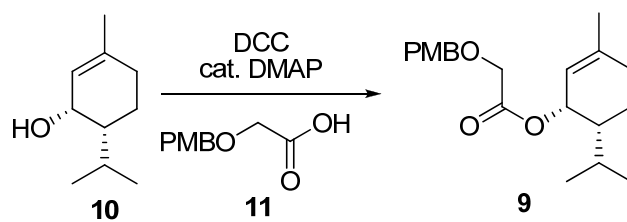

To a solution of (-)-*cis*-piperitol **10** (2.8 g, 17.95 mmol) in anhydrous CH<sub>2</sub>Cl<sub>2</sub> (50 mL) was added acid **11**<sup>1</sup> (6.0 g, 30.61 mmol) followed by dicyclohexylcarbodiimide (9.24 g, 44.9 mmol) and N-N-dimethylamino pyridine (440 mg, 3.59 mmol) at 0 °C under nitrogen. The slurry was stirred at room temperature for 12 h. The resulting white solids were filtered off and washed with 100 mL of ether. The ether layer was washed with 25 mL of 1 N HCl, 25 mL of saturated NaHCO<sub>3</sub>, and 25 mL of brine, dried (Na<sub>2</sub>SO<sub>4</sub>), and evaporated. The crude residue was purified by flash chromatography (ethylacetate/pentane, 3/10) to give the title compound **8** (4.53 g, 76%) as colorless oil. *R*<sub>f</sub> = 0.55 (20% ethyl acetate/pentane); <sup>1</sup>H NMR (400 MHz, CDCl<sub>3</sub>) δ 7.30 (d, *J* = 8.7 Hz, 2H), 6.89 (d, *J* = 8.7 Hz, 2H), 5.70 – 5.65 (m, 1H), 5.38 – 5.33 (m, 1H), 4.57 (s, 2H), 4.03 (s, 2H), 3.81 (s, 3H), 2.09 – 1.95 (m, 2H), 1.83 – 1.75 (m, 1H), 1.71 (s, 3H), 1.61 – 1.40 (m, 2H), 1.18 (ddt, *J* = 12.4, 9.1, 3.1 Hz, 1H), 0.95 (d, *J* = 6.7 Hz, 3H), 0.91 (d, *J* = 6.7 Hz, 3H); <sup>13</sup>C NMR (100 MHz, CDCl<sub>3</sub>) δ 170.24, 159.44, 141.99, 129.69, 129.40, 119.53, 113.83, 72.84, 69.35, 67.00, 55.26, 44.47, 31.24, 28.38, 23.32, 21.39, 20.82, 20.72.; IR (ATR, neat) ν<sub>max</sub> 2960, 2873, 1743, 1512, 1115, 1035, 896 cm<sup>-1</sup>.; HRMS (ESI): calcd. for C<sub>20</sub>H<sub>32</sub>O<sub>4</sub>N<sub>1</sub> (M+NH<sub>4</sub>)<sup>+</sup> *m/z* 350.2325 found *m/z* 350.2322.; [α]<sub>D</sub><sup>25</sup> -120.9 (*c* 2.40, CHCl<sub>3</sub>).

### Carboxylic acid (-)-**8**

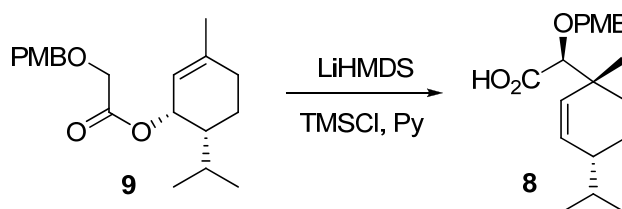

<sup>1</sup> Prepared as mentioned in the literature: Stockley, M.; Clegg, W.; Fontana, G.; Golding, B. T.; Martin, N.; Rigoreau, L. J. M.; Smith, G. C. M.; Griffina, R. J. *Bioorg. Med. Chem. Lett.* **2001**, *11*, 2837–2841.

To a solution of compound **9** (4.5 g, 13.55 mmol) in THF (200 mL) was added TMSCl (15.5 mL, 122.0 mmol) and pyridine (4.8 mL, 59.5 mmol) at  $-78\text{ }^{\circ}\text{C}$  and stirred for 5 min. Then, a freshly prepared LiHMDS in THF [Prepared by adding *n*-BuLi (1.6 M in hexanes, 42.4 mL, 67.8 mmol) into a solution of HMDS (15 mL, 71.9 mmol) in THF (65.0 mL) at  $-20\text{ }^{\circ}\text{C}$ , and stirring at  $-10\text{ }^{\circ}\text{C}$  for 30 min, then to rt for 1 h] was added into the reaction mixture via cannula at  $-78\text{ }^{\circ}\text{C}$ . After 30 min at  $-78\text{ }^{\circ}\text{C}$ , the reaction mixture was warmed slowly to room temperature for 1 h. The reaction was quenched at  $0\text{ }^{\circ}\text{C}$  with 1 N HCl (15 mL) and the solvent was removed under reduced pressure. The resulting residue was acidified to pH=2 with conc. HCl and extracted with 2X 30 mL of ether. The combined organic layers were washed with brine and the solvent was removed under reduced pressure. The crude product was purified over short silica gel chromatography (ethylacetate/pentane, 8:10) to yield acid **8** (4.3 g, 95 %) as viscous oil.  $R_f = 0.32$  (50% ethyl acetate/pentane);  $^1\text{H NMR}$  (400 MHz,  $\text{CDCl}_3$ )  $\delta$  7.28 (d,  $J = 8.2$  Hz, 2H), 6.89 (d,  $J = 8.3$  Hz, 2H), 5.67 – 5.63 (m, 1H), 5.51 – 5.44 (m, 1H), 4.65 (d,  $J = 11.2$  Hz, 1H), 4.34 (d,  $J = 11.4$  Hz, 1H), 3.81 (s, 3H), 3.77 (bs, 1H), 2.06 – 1.98 (m, 1H), 1.84 (qd,  $J = 6.0, 3.1$  Hz, 1H), 1.61 – 1.51 (m, 1H), 1.50 – 1.41 (m, 1H), 1.29 – 1.06 (m, 2H), 1.05 (s, 3H), 0.87 (d,  $J = 6.8$  Hz, 3H), 0.83 (d,  $J = 6.8$  Hz, 3H);  $^{13}\text{C NMR}$  (100 MHz,  $\text{CDCl}_3$ )  $\delta$  180.22, 159.59, 132.24, 131.71, 130.01, 128.97, 113.86, 82.81, 72.82, 55.27, 41.47, 38.20, 31.84, 31.38, 23.87, 21.35, 19.83, 19.38.; IR (ATR, neat)  $\nu_{\text{max}}$  2955, 2871, 1711, 1512, 1246, 1089, 1035, 819  $\text{cm}^{-1}$ .; HRMS (ESI): calcd. for  $\text{C}_{20}\text{H}_{32}\text{O}_4\text{N}_1$  ( $\text{M}+\text{NH}_4$ ) $^+$   $m/z$  350.2325 found  $m/z$  350.2317.;  $[\alpha]_D^{25} -27.4$  ( $c$  2.0,  $\text{CHCl}_3$ ).

#### Alcohol (-)-**12**

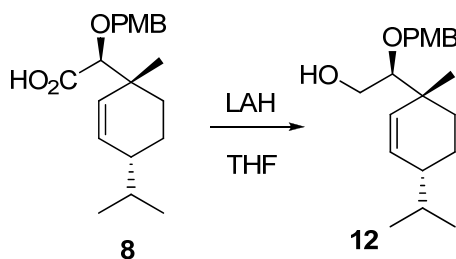

A stirred suspension of LAH (1.73 g, 45.33 mmol) in THF (80 mL) was cooled at  $0\text{ }^{\circ}\text{C}$  and then treated drop wise with a solution of carboxylic acid **8** (4.3 g, 12.95 mmol) in THF (40 mL). The resulting suspension was allowed to stir at room temperature for 12 h, and then further refluxed it for 2 h. The resultant mixture was warmed to room temperature and stirred for 2 h. The reaction

was quenched by adding 60 g of Na<sub>2</sub>SO<sub>4</sub>·10H<sub>2</sub>O/Celite mixture (1:1) at 0 °C and the solution was stirred for 3 h. The mixture was then filtered through a pad of Celite and concentrated under reduced pressure. The residue was then purified by flash chromatography (ethylacetate/pentane, 4:10) to afford the alcohol **12** (3.8 g, 92%) as colorless oil. *R<sub>f</sub>* = 0.40 (40 % ethyl acetate/pentane); <sup>1</sup>H NMR (400 MHz, CDCl<sub>3</sub>) δ 7.30 (d, *J* = 6.5 Hz, 2H), 6.90 (d, *J* = 8.6 Hz, 2H), 5.66 (ddd, *J* = 10.3, 2.8, 0.9 Hz, 1H), 5.47 (ddd, *J* = 10.3, 2.3, 1.2 Hz, 1H), 4.67 (d, *J* = 11.2 Hz, 1H), 4.60 (d, *J* = 11.1 Hz, 1H), 3.81 (s, 3H), 3.77 (ddd, *J* = 10.9, 7.1, 3.6 Hz, 1H), 3.65 (ddd, *J* = 11.3, 7.2, 3.5 Hz, 1H), 3.39 (dd, *J* = 7.2, 3.6 Hz, 1H), 1.98 (dddd, *J* = 13.5, 5.9, 3.0, 1.2 Hz, 1H), 1.87 (ddq, *J* = 8.6, 5.7, 2.9 Hz, 1H), 1.84 – 1.80 (m, 1H), 1.65 – 1.57 (m, 1H), 1.57 – 1.52 (m, 1H), 1.40 (dddd, *J* = 13.3, 11.9, 8.9, 3.1 Hz, 1H), 1.20 (ddd, *J* = 13.3, 11.7, 3.3 Hz, 1H), 1.01 (s, 3H), 0.92 (d, *J* = 6.8 Hz, 3H), 0.89 (d, *J* = 6.8 Hz, 3H); <sup>13</sup>C NMR (101 MHz, CDCl<sub>3</sub>) δ 159.26, 133.79, 131.47, 130.88, 129.35, 113.87, 84.78, 74.36, 62.24, 55.24, 41.62, 38.61, 31.91, 31.82, 24.13, 21.68, 19.88, 19.56.; IR (ATR, neat) ν<sub>max</sub> 2955, 2870, 1711, 1612, 1512, 1245, 1089, 1033, 818 cm<sup>-1</sup>.; HRMS (ESI): calcd. for C<sub>20</sub>H<sub>30</sub>O<sub>3</sub>Na (M+Na)<sup>+</sup> *m/z* 341.2087 found *m/z* 347.2095.; [α]<sub>D</sub><sup>25</sup> -20.1 (*c* 2.0, CHCl<sub>3</sub>).

#### Iodide (-)-**13**

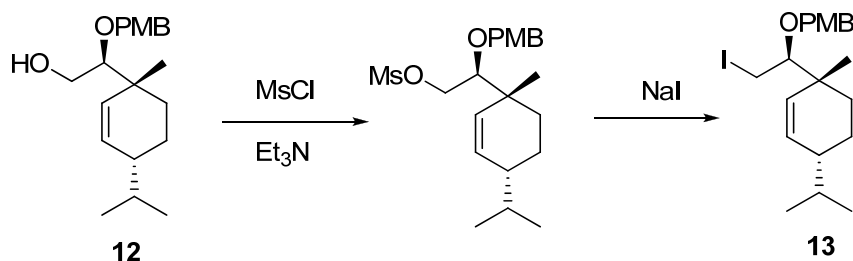

To a stirred solution of alcohol **12** (3.8 g, 11.95 mmol) and Et<sub>3</sub>N (4.2 mL, 29.87 mmol) in CH<sub>2</sub>Cl<sub>2</sub> was added methane sulfonylchloride (1.9 mL, 23.9 mmol) at 0 °C under nitrogen atmosphere and stirred it for 4 h. The reaction was quenched with ice water (20 mL), and the organic layer was washed with sat. NaHCO<sub>3</sub>, brine and dried over Na<sub>2</sub>SO<sub>4</sub>. The solvent was removed under reduced pressure to yield methanesulfonate (4.7 g, 92%) as a colorless viscous oil and was carried forward without purification. *R<sub>f</sub>* = 0.45 (40% ethyl acetate/pentane); <sup>1</sup>H NMR (400 MHz, CDCl<sub>3</sub>) δ 7.34 (d, *J* = 6.6 Hz, 2H), 6.93 (d, *J* = 6.7 Hz, 2H), 5.72 (ddd, *J* = 10.2, 2.8, 1.0 Hz, 1H), 5.46 (ddd, *J* = 10.3, 2.4, 1.3 Hz, 1H), 4.75 (d, *J* = 10.9 Hz, 1H), 4.61 (d, *J* = 11.0 Hz, 1H), 4.54 (dd, *J* = 10.6, 2.5 Hz, 1H), 4.30 (dd, *J* = 10.6, 7.6 Hz, 1H), 3.86 (s, 3H), 3.59 (dd, *J*

= 7.6, 2.5 Hz, 1H), 3.01 (s, 3H), 2.01 (ddd,  $J = 13.5, 5.7, 3.0$  Hz, 1H), 1.93 (dt,  $J = 5.9, 2.7$  Hz, 1H), 1.67 – 1.58 (m, 1H), 1.59 – 1.51 (m, 1H), 1.35 – 1.27 (m, 1H), 1.26 – 1.17 (m, 1H), 1.04 (s, 3H), 0.94 (d,  $J = 6.8$  Hz, 3H), 0.90 (d,  $J = 6.8$  Hz, 3H);  $^{13}\text{C}$  NMR (101 MHz,  $\text{CDCl}_3$ )  $\delta$  159.29, 132.65, 132.61, 130.41, 129.61, 113.76, 81.35, 74.27, 71.59, 55.32, 41.62, 38.69, 37.39, 31.88, 31.75, 23.57, 21.34, 19.89, 19.47.; IR (ATR, neat)  $\nu_{\text{max}}$  2958, 2871, 1611, 1512, 1461, 1355, 1174, 956, 823  $\text{cm}^{-1}$ ; LRMS (ESI):  $\text{C}_{21}\text{H}_{32}\text{O}_5\text{NaS}$  ( $\text{M}+\text{Na}$ ) $^+$   $m/z$  419.19;  $[\alpha]_{\text{D}}^{25}$   $-12.6$  ( $c$  2.1,  $\text{CHCl}_3$ ).

A mixture of the above methanesulfonate (4.56 g, 10.65 mmol) and NaI (9.6 g, 63.93 mmol) in methylethylketone (100 mL) was heated under reflux for 24 h. After cooling, the mixture was diluted with diethylether (50 mL) and poured into water (50 mL). The organic layer was washed with aq. Sodium thiosulfate, aq.  $\text{NaHCO}_3$ , and brine and evaporated to dryness. The resulting residue was purified by flash chromatography (diethylether/pentane, 2:10) to afford the iodo compound **13** (4.1 g, 84%) as pale yellow oil.  $R_f = 0.60$  (5% ethyl acetate/pentane);  $^1\text{H}$  NMR (400 MHz,  $\text{CDCl}_3$ )  $\delta$  7.37 (d,  $J = 2.0$  Hz, 2H), 6.89 (d,  $J = 2.1$  Hz, 2H), 5.70 (dd,  $J = 10.2, 2.8$  Hz, 1H), 5.47 (d,  $J = 7.7$  Hz, 1H), 4.89 (d,  $J = 10.2$  Hz, 1H), 4.61 (d,  $J = 10.2$  Hz, 1H), 3.82 (s, 3H), 3.61 (dd,  $J = 9.1, 2.5$  Hz, 1H), 3.46 (dd,  $J = 10.5, 2.5$  Hz, 1H), 3.30 (dd,  $J = 10.5, 9.1$  Hz, 1H), 2.02 – 1.94 (m, 1H), 1.88 – 1.84 (m, 1H), 1.67 – 1.51 (m, 2H), 1.45 – 1.37 (m, 1H), 1.29 – 1.18 (m, 1H), 1.00 (s, 3H), 0.92 (d,  $J = 6.7$  Hz, 3H), 0.89 (d,  $J = 6.8$  Hz, 3H);  $^{13}\text{C}$  NMR (100 MHz,  $\text{CDCl}_3$ )  $\delta$  159.18, 133.41, 132.00, 130.54, 129.54, 113.65, 85.12, 75.02, 55.27, 41.61, 41.28, 31.89, 31.54, 23.34, 21.60, 20.01, 19.68, 7.24; IR (ATR, neat)  $\nu_{\text{max}}$  2954, 2868, 1612, 1512, 1460, 1246, 1173, 1077, 1034, 820  $\text{cm}^{-1}$ ; HRMS (ESI): calcd. for  $\text{C}_{20}\text{H}_{33}\text{N}_1\text{O}_2\text{I}$  ( $\text{M}+\text{NH}_4$ ) $^+$   $m/z$  446.1550 found  $m/z$  446.1542;  $[\alpha]_{\text{D}}^{25}$   $-5.1$  ( $c$  1.04,  $\text{CHCl}_3$ ).

#### Diene (-)-**14**

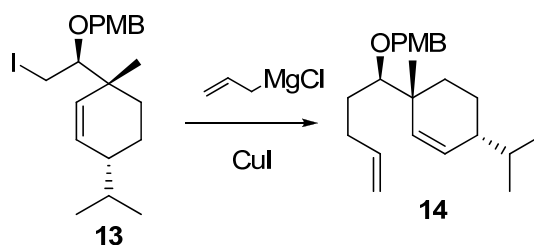

Allylmagnesium chloride (10.8 mL, 17.2 mmol, 1.7 M in THF) was added to a mixture of  $\text{CuI}$  (140 mg, 0.74 mmol, 15 mol%) and iodide **13** (2.1 g, 4.91 mmol) in THF–HMPA (6:1, 30 mL) at

-40 °C over a period of 10 min. The mixture was allowed to warm to 0 °C over a period of 2 h then at room temperature for 16 h. The reaction was quenched by aq. NH<sub>3</sub> and NH<sub>4</sub>Cl solution at 0 °C. The organic layer was separated and the aqueous layer was extracted with diethyl ether and the combined organic phase was washed with brine. After drying over Na<sub>2</sub>SO<sub>4</sub>, the solvent was removed under vacuo. The residue was purified with gel column chromatography (ether/pentane, 1:10) to give 1.22 g (73%) of **14** as colorless oil.  $R_f = 0.42$  (10% diethylether/pentane); **<sup>1</sup>H NMR (400 MHz, CDCl<sub>3</sub>)** δ 7.29 (d,  $J = 1.7$  Hz, 2H), 6.87 (d,  $J = 2.1$  Hz, 2H), 5.86 – 5.79 (m, 1H), 5.63 (dd,  $J = 10.3, 2.7$  Hz, 1H), 5.48 (d,  $J = 8.8$  Hz, 1H), 5.03 (d,  $J = 16.7$  Hz, 1H), 4.96 (d,  $J = 1.8$  Hz, 1H), 4.56 (d,  $J = 10.8$  Hz, 1H), 4.52 (d,  $J = 10.8$  Hz, 1H), 3.81 (s, 3H), 3.26 (dd,  $J = 8.2, 3.8$  Hz, 1H), 2.35 – 2.25 (m, 1H), 2.17 – 2.04 (m, 1H), 2.01 – 1.97 (m, 1H), 1.90 – 1.87 (m, 1H), 1.68 – 1.58 (m, 3H), 1.54 – 1.42 (m, 2H), 1.28 – 1.15 (m, 1H), 0.97 (s, 3H), 0.92 (d,  $J = 6.7$  Hz, 3H), 0.88 (d,  $J = 6.8$  Hz, 3H); **<sup>13</sup>C NMR (101 MHz, CDCl<sub>3</sub>)** δ 158.99, 139.01, 135.00, 131.31, 130.70, 129.16, 114.50, 113.65, 83.90, 74.36, 55.28, 41.72, 39.82, 31.93, 31.49, 31.33, 30.34, 23.65, 21.69, 19.96, 19.63; **IR (ATR, neat)**  $\nu_{\max}$  2953, 2868, 1613, 1512, 1460, 1245, 1173, 1078, 1037, 906, 820 cm<sup>-1</sup>; **HRMS (ESI)**: Not ionized;  $[\alpha]_D^{25} -5.4$  ( $c$  1.62, CHCl<sub>3</sub>).

#### Aldehyde (-)-7

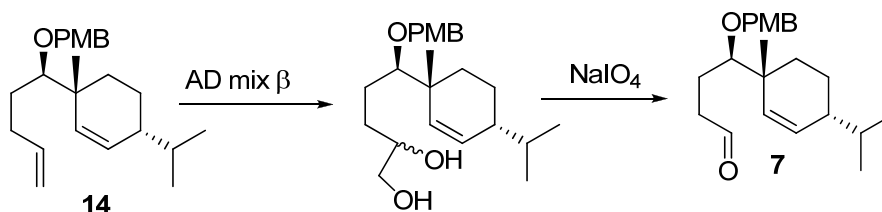

A solution of diene **14** (1.2 g, 3.51mmol) in 18 mL of *tert*-BuOH was treated with a solution of 6 g of AD-mix-  $\beta$  in 18 mL of distilled water at 0 °C. After 15 min, the solution was warm to 5 °C and was stirred for 36 h. The mixture was quenched with a saturated solution of Na<sub>2</sub>SO<sub>3</sub> and stirred for 1 h. The aqueous layer was extracted with EtOAc (5X 20 mL) and the combined organic extracts were dried over Na<sub>2</sub>SO<sub>4</sub>, filtered and concentrated under reduced pressure. The residue was purified by flash chromatography on silica gel (EtOAc/pentane, 8:10) to give 1.2 g (91%) of diol as a viscous liquid.  $R_f = 0.25$  (60% ethyl acetate/pentane); **<sup>1</sup>H NMR (400 MHz, CDCl<sub>3</sub>)** δ 7.28 (d,  $J = 8.1$  Hz, 2H), 6.87 (d,  $J = 7.9$  Hz, 2H), 5.65 (dd,  $J = 10.2, 2.7$  Hz, 1H), 5.47 (dd,  $J = 10.4, 2.3$  Hz, 1H), 4.58 (dd,  $J = 10.8, 2.6$  Hz, 1H), 4.48 (d,  $J = 10.8$  Hz, 1H), 3.80 (s, 3H), 3.65 – 3.55 (m, 2H), 3.42 – 3.35 (m, 1H), 3.23 (t,  $J = 6.0$  Hz, 1H), 2.75 (bs, 1H), 2.48 (bs,

1H), 2.00 – 1.96 (m, 1H), 1.89 – 1.85 (m, 1H), 1.80 – 1.56 (m, 5H), 1.51 – 1.41 (m, 2H), 1.29 – 1.17 (m, 1H), 0.98 (s, 3H), 0.92 (d,  $J = 6.7$  Hz, 3H), 0.88 (d,  $J = 6.8$  Hz, 3H);  $^{13}\text{C}$  NMR (100 MHz,  $\text{CDCl}_3$ )  $\delta$  159.06, 134.81, 130.88, 130.84, 129.28, 113.65, 84.64, 74.59, 72.29, 66.73, 55.24, 41.69, 39.88, 31.89, 31.17, 30.56, 26.65, 23.75, 21.74, 19.98, 19.68; IR (ATR, neat)  $\nu_{\text{max}}$  3375, 2932, 2868, 1612, 1512, 1460, 1246, 1068, 1035, 818  $\text{cm}^{-1}$ ; HRMS (ESI): calcd. for  $\text{C}_{23}\text{H}_{37}\text{O}_4$  (M+H) $^+$   $m/z$  377.2686 found  $m/z$  377.2703;  $[\alpha]_{\text{D}}^{25}$   $-0.29$  ( $c$  1.15,  $\text{CHCl}_3$ ).

$\text{NaIO}_4$  was added to the solution of above diol in a mixture of 16 mL of *tert*-BuOH and 16 mL of distilled water at 0 °C in portion over 5 min and mixture was stirred at room temperature for 1 h. The reaction mixture was quenched with water and extracted with EtOAc (3 x 10 mL). The combined organic layers were washed with brine, dried ( $\text{Na}_2\text{SO}_4$ ) and concentrated. Flash column chromatography (2:10 ethyl acetate/pentane) of the crude product gave aldehyde **7** (1.05 g, 95%) as a colorless.  $R_f = 0.61$  (30% ethyl acetate/pentane);  $^1\text{H}$  NMR (400 MHz,  $\text{CDCl}_3$ )  $\delta$  9.70 (t,  $J = 1.8$  Hz, 1H), 7.27 (d,  $J = 8.6$  Hz, 2H), 6.88 (d,  $J = 8.7$  Hz, 2H), 5.67 (dd,  $J = 7.4, 0.8$  Hz, 1H), 5.49 (ddd,  $J = 10.3, 2.3, 1.1$  Hz, 1H), 4.57 (d,  $J = 10.8$  Hz, 1H), 4.42 (d,  $J = 10.8$  Hz, 1H), 3.81 (s, 3H), 3.24 (dd,  $J = 9.4, 3.3$  Hz, 1H), 2.53 (ddd,  $J = 8.1, 6.6, 1.9$  Hz, 1H), 2.44 (dddd,  $J = 17.3, 8.0, 6.5, 1.6$  Hz, 1H), 1.98 (dddd,  $J = 13.5, 6.3, 3.2, 1.1$  Hz, 1H), 1.94 – 1.85 (m, 2H), 1.85 – 1.76 (m, 1H), 1.63 – 1.55 (m, 2H), 1.53 – 1.42 (m, 1H), 1.28 – 1.19 (m, 1H), 1.00 (s, 3H), 0.92 (d,  $J = 6.8$  Hz, 3H), 0.89 (d,  $J = 6.8$  Hz, 3H);  $^{13}\text{C}$  NMR (101 MHz,  $\text{CDCl}_3$ )  $\delta$  202.63, 159.10, 134.54, 131.11, 130.81, 129.30, 113.69, 83.79, 74.32, 55.25, 41.66, 41.60, 39.94, 31.89, 31.12, 23.84, 23.47, 21.73, 19.98, 19.68; IR (ATR, neat)  $\nu_{\text{max}}$  2955, 2869, 1612, 1722, 1612, 1512, 1461, 1246, 1077, 1034, 817  $\text{cm}^{-1}$ ; HRMS (ESI): calcd. for  $\text{C}_{22}\text{H}_{33}\text{O}_3$  (M+H) $^+$   $m/z$  345.2424 found  $m/z$  345.2422;  $[\alpha]_{\text{D}}^{25}$   $-5.9$  ( $c$  1.17,  $\text{CHCl}_3$ ).

#### Isoxazole (-)-**15**

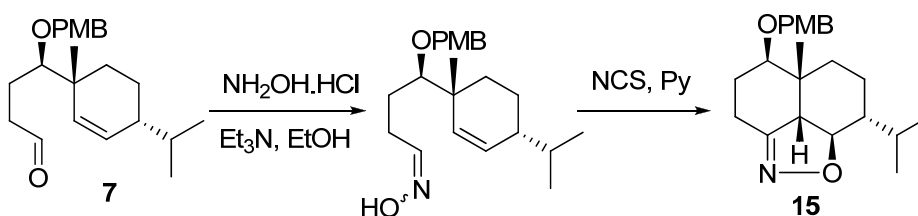

To a solution of the above aldehyde **7** (1.05 g, 3.05 mmol) in EtOH (23 ml) were added  $\text{NH}_2\text{OH}\cdot\text{HCl}$  (2.2 g, 32.0 mmol) and  $\text{Et}_3\text{N}$  (4.6 mL, 33.0 mmol) at 0 °C and the mixture was stirred at rt



for 16 h. The reaction was diluted with water and extracted with AcOEt. The combined extracts were dried with Na<sub>2</sub>SO<sub>4</sub> and concentrated to afford a diastereomeric mixture of oxime as viscous oil (1.04g, 95%).

To a solution of above oxime (970 mg, 2.70 mmol) and N-chlorosuccinimide (380 mg, 2.85 mmol) in chloroform (43 mL) was added pyridine (156 μL) at room temperature and stirred it for 2 h. Then, it was further stirred at 60 °C for another 6 h. The solvent was removed under reduced pressure and diluted with water (15 mL). The mixture was extracted with CH<sub>2</sub>Cl<sub>2</sub> (3 X 20 mL) and the combined extracts were dried over Na<sub>2</sub>SO<sub>4</sub> and concentrated in vacuo. The residue was purified by flash chromatography (3:10 ethyl acetate/pentane) to give isoxazoline **15** (800 mg, 83%). *R<sub>f</sub>* = 0.45 (30% ethyl acetate/pentane); <sup>1</sup>H NMR (500 MHz, CDCl<sub>3</sub>) δ 7.28 (d, *J* = 8.3 Hz, 2H), 6.90 (d, *J* = 8.6 Hz, 2H), 4.85 (ddd, *J* = 11.2, 1.1, 2.6 Hz, 1H), 4.58 (d, *J* = 11.2 Hz, 1H), 4.36 (d, *J* = 11.2 Hz, 1H), 3.82 (s, 3H), 3.32 (dt, *J* = 11.8, 1.5 Hz, 1H), 3.11 (dd, *J* = 2.8, 0.8 Hz, 1H), 2.52 (ddd, *J* = 13.4, 5.3, 2.0 Hz, 1H), 1.76 – 1.67 (m, 3H), 1.50 – 1.43 (m, 1H), 1.40 – 1.31 (m, 2H), 1.21 (s, 3H), 1.24 – 1.17 (m, 1H), 1.03 (d, *J* = 6.6 Hz, 3H), 0.93 (d, *J* = 6.7 Hz, 3H); <sup>13</sup>C NMR (101 MHz, CDCl<sub>3</sub>) δ 159.12, 130.63, 129.12, 113.70, 99.92, 81.91, 77.91, 71.03, 55.26, 52.59, 41.27, 37.82, 30.14, 29.00, 26.57, 24.36, 21.27, 21.03, 20.46, 19.48; IR (ATR, neat) ν<sub>max</sub> 2952, 2870, 1611, 1512, 1461, 1276, 1247, 1172, 1072, 1032, 820 cm<sup>-1</sup>; HRMS (ESI): calcd. for C<sub>22</sub>H<sub>32</sub>N<sub>1</sub>O<sub>3</sub> (M+H)<sup>+</sup> *m/z* 358.2376 found *m/z* 358.2375; [α]<sub>D</sub><sup>25</sup> -37.2 (*c* 1.04, CHCl<sub>3</sub>).

#### Hydroxy ketone (+)-**16**

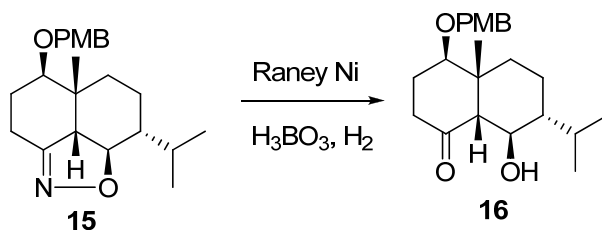

To a solution of isoxazoline **15** (570 mg, 1.6 mmol) in methanol/water (10:1, 80 mL) was added boric acid (890 mg, 14.4 mmol) and a Raney nickel (20-30 mg, 50% in water). The reaction was placed under hydrogen atmosphere for 6 at room temperature. The reaction mixture was filtered through Celite and the solvent was removed under reduced pressure. The obtained residue was dissolved in CH<sub>2</sub>Cl<sub>2</sub> (15 mL) and washed with saturated aq. NaHCO<sub>3</sub>. The aqueous layer was extracted with CH<sub>2</sub>Cl<sub>2</sub> (2 X 15 mL) and the combined organic layers were washed with brine,

dried over  $\text{Na}_2\text{SO}_4$ , and concentrated in vacuo to yield 430 mg (75%) of pure hydroxy ketone **16** after chromatography (5:10, ethyl acetate/pentane).  $R_f = 0.32$  (50% ethyl acetate/pentane);  $^1\text{H NMR}$  (400 MHz,  $\text{CDCl}_3$ )  $\delta$  7.27 (d,  $J = 8.1$ , 2H), 6.90 (d,  $J = 8.2$  Hz, 2H), 4.64 (d,  $J = 11.6$  Hz, 1H), 4.38 (d,  $J = 11.6$  Hz, 1H), 3.85 – 3.81 (m, 1H), 3.82 (s, 3H), 3.72 – 3.65 (m, 1H), 2.62 (td,  $J = 14.7, 7.1$  Hz, 1H), 2.41 – 2.27 (m, 2H), 2.18 – 2.07 (m, 2H), 1.95 (dd,  $J = 10.7, 1.9$  Hz, 1H), 1.89 – 1.76 (m, 1H), 1.44 – 1.37 (m, 1H), 1.35 – 1.28 (m, 1H), 1.14 – 1.07 (m, 1H), 0.93 (s, 3H), 0.90 (d,  $J = 7.0$  Hz, 3H), 0.88 – 0.78 (m, 2H), 0.74 (d,  $J = 6.9$  Hz, 3H);  $^{13}\text{C NMR}$  (100 MHz,  $\text{CDCl}_3$ )  $\delta$  212.52, 159.29, 130.32, 129.59, 113.78, 72.09, 70.74, 70.18, 68.10, 55.28, 49.99, 42.56, 36.33, 33.91, 25.82, 25.60, 22.21, 20.81, 18.13, 15.95; IR (ATR, neat)  $\nu_{\text{max}}$  3440, 2951, 2873, 1694, 1611, 1511, 1252, 1247, 1171, 1051, 1034, 810  $\text{cm}^{-1}$ ; HRMS (ESI): calcd. for  $\text{C}_{22}\text{H}_{36}\text{N}_1\text{O}_4$  ( $\text{M}+\text{NH}_4$ ) $^+$   $m/z$  378.2638 found  $m/z$  378.2653;  $[\alpha]_D^{25} +13.3$  ( $c$  1.0,  $\text{CHCl}_3$ ).

#### Ketone (-)-**17**

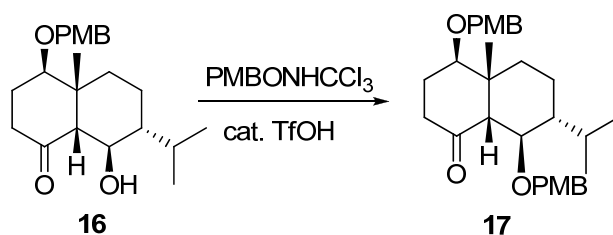

To a solution of  $\beta$ -hydroxy ketone **16** (100 mg, 0.28 mmol) and *p*-methoxybenzyl-2,2,2-trichloroacetimidate (118 mg, 0.42 mmol) in anhydrous diethylether (3 mL) was added a solution of triflic acid in diethyl ether (0.2 M in ether, 40  $\mu\text{L}$ , 0.008 mmol) at 0  $^\circ\text{C}$ . After 10 min, the reaction mixture was allowed to stir at room temperature for 24 h. The reaction mixture was cooled back to 0  $^\circ\text{C}$  and treated with a aliquot of triflic acid (20  $\mu\text{L}$ , 0.004 mmol) and stirred at rt for another 3 h. The mixture was quenched with sat. solution of  $\text{NaHCO}_3$  and extracted with ether (3 X 10 mL). The combined organic layers were dried over  $\text{Na}_2\text{SO}_4$ , concentrated in vacuo and purified by flash chromatography (ethylacetate/pentane, 1:4) to give PMB ether **17** as pale yellow oil (110 mg, 82%).  $R_f = 0.45$  (40% ethyl acetate/pentane);  $^1\text{H NMR}$  (300 MHz,  $\text{CDCl}_3$ )  $\delta$  7.27 (d,  $J = 8.4$  Hz, 2H), 7.19 (d,  $J = 8.2$  Hz, 2H), 6.90 (d,  $J = 8.3$  Hz, 2H), 6.84 (d,  $J = 8.5$  Hz, 2H), 4.65 (d,  $J = 11.6$  Hz, 1H), 4.39 (d,  $J = 11.4$ , 1H), 4.38 (d,  $J = 9.7$  Hz, 1H), 4.18 (d,  $J = 9.6$  Hz, 1H), 3.89 – 3.75 (m, 2H), 3.82 (s, 3H), 3.79 (s, 3H), 2.73 – 2.61 (m, 1H), 2.37 – 2.27 (m, 3H), 2.24 – 2.05 (m, 2H), 1.93 – 1.75 (m, 1H), 1.49 – 1.27 (m, 2H), 0.94 (s, 3H), 0.91 (d,  $J = 7.2$

Hz, 3H), 0.90 – 0.87 (m, 2H), 0.77 (d,  $J = 6.9$  Hz, 3H);  $^{13}\text{C}$  NMR (75 MHz,  $\text{CDCl}_3$ )  $\delta$  211.60, 159.28, 159.20, 130.36, 130.09, 129.81, 129.56, 113.77, 113.75, 76.78, 72.13, 70.70, 68.38, 64.69, 55.26, 55.24, 46.88, 43.08, 36.83, 33.92, 26.28, 25.10, 22.02, 21.07, 18.05, 15.82; IR (ATR, neat)  $\nu_{\text{max}}$  2954, 2872, 1711, 1611, 1511, 1461, 1244, 1247, 1174, 1061, 1032, 820  $\text{cm}^{-1}$ ; HRMS (ESI): calcd. for  $\text{C}_{30}\text{H}_{44}\text{N}_1\text{O}_5$  ( $\text{M}+\text{NH}_4$ ) $^+$   $m/z$  498.3214 found  $m/z$  498.3213;  $[\alpha]_D^{25}$   $-6.2$  ( $c$  1.9,  $\text{CHCl}_3$ ).

#### Olefin (+)-**18**

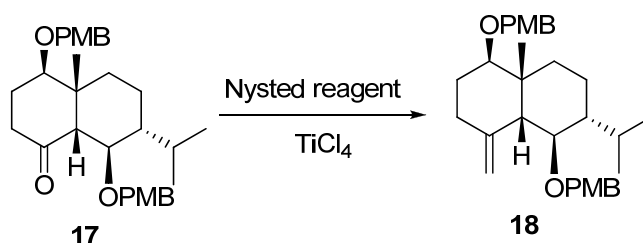

Neat  $\text{TiCl}_4$  (90  $\mu\text{L}$ , 0.83 mmol) was added to a solution of freshly shaken Nysted's reagent (nominally 20%w/w in THF, 1.7 mL, 0.88 mmol) in THF (2.5 mL) at  $0^\circ\text{C}$ , followed by a solution of ketone **17** (120 mg, 0.25 mmol) in THF (3 mL). The cooling bath was removed and the mixture was stirred at room temperature for 2 h, then at  $50^\circ\text{C}$  for 6 h. The dark brown slurry was diluted with diethyl ether (5 mL) and poured into a 1N solution of aq. HCl (5 mL) at  $0^\circ\text{C}$ . The organic layer was separated and the aqueous layer was extracted with diethyl ether (3 X 5 mL). The combined extracts were washed once with brine, dried over anhydrous  $\text{Na}_2\text{SO}_4$  and concentrated under reduced pressure. The crude material was purified by flash chromatography (ethylacetate/pentane, 1:10) to yield the olefin **18** (31 mg, 25%, 44% brsm) as a pale oil, further elution (ethylacetate/pentane, 4:10) gave recovered starting material **17** (52 mg, 43%).  $R_f = 0.70$  (20% ethyl acetate/pentane);  $^1\text{H}$  NMR (300 MHz,  $\text{CDCl}_3$ )  $\delta$  7.29 (d,  $J = 8.4$  Hz, 2H), 7.23 (d,  $J = 8.6$  Hz, 2H), 6.91 (d,  $J = 2.0$  Hz, 2H), 6.83 (d,  $J = 8.7$  Hz, 2H), 4.95 (d,  $J = 3.0$  Hz, 1H), 4.89 (d,  $J = 2.6$  Hz, 1H), 4.61 (d,  $J = 11.6$  Hz, 1H), 4.43 (d,  $J = 9.4$  Hz, 1H), 4.36 (d,  $J = 11.6$  Hz, 1H), 4.26 (d,  $J = 9.4$  Hz, 1H), 3.82 (s, 3H), 3.79 (s, 3H), 3.57 (dd,  $J = 11.5, 4.7$  Hz, 1H), 3.40 (t,  $J = 10.4$  Hz, 1H), 2.39 (dd,  $J = 9.4, 3.7$  Hz, 2H), 2.26 – 2.16 (m, 1H), 2.13 – 2.03 (m, 3H), 1.63 – 1.54 (m, 1H), 1.34 – 1.26 (m, 4H), 0.91 (s, 3H), 0.87 (d,  $J = 7.0$  Hz, 3H), 0.75 (d,  $J = 6.9$  Hz, 3H);  $^{13}\text{C}$  NMR (75 MHz,  $\text{CDCl}_3$ )  $\delta$  159.10, 159.08, 145.54, 131.04, 130.94, 129.78, 129.40, 113.67, 113.06, 76.16, 74.05, 72.58, 70.39, 60.14, 55.26, 49.03, 40.89, 34.26, 30.66, 27.17,

25.62, 22.27, 21.33, 17.94, 16.10; **IR (ATR, neat)**  $\nu_{\max}$  2931, 2875, 1612, 1511, 1245, 1172, 1063, 1035, 890, 820  $\text{cm}^{-1}$ ; **HRMS (ESI):** calcd. for  $\text{C}_{31}\text{H}_{46}\text{N}_1\text{O}_4$  ( $\text{M}+\text{NH}_4$ )<sup>+</sup>  $m/z$  496.34221 found  $m/z$  496.3414;  $[\alpha]_{\text{D}}^{25} +6.9$  ( $c$  1.34,  $\text{CHCl}_3$ ).

(+)-5-*epi*-eudesma-4(15)-ene-1 $\beta$ ,6 $\beta$ -diol (**2**)

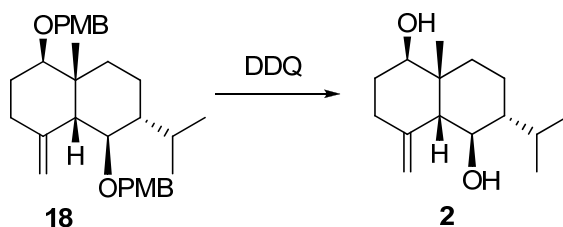

The compound **18** (24.5 mg, 0.103 mmol) was dissolved in  $\text{CH}_2\text{Cl}_2$  and pH 8 phosphate buffer mixture (1.6 mL, 5:1). The solution was cooled to 0 °C and was added DDQ (137 mg, 0.606 mmol) at once with vigorous stirring. After 2 h, the reaction was diluted with  $\text{CH}_2\text{Cl}_2$  and the organic layer was washed with half-saturated  $\text{NaHCO}_3$  solution (3 X 5 mL), brine, dried over  $\text{Na}_2\text{SO}_4$  and concentrated. Flash chromatography (ethylacetate/pentane, 1:1) to give the target molecule **2** in 73% yield (9.2 mg) as viscous oil.  $R_f = 0.45$  (40% ethyl acetate/pentane);  **$^1\text{H}$  NMR (500 MHz,  $\text{CDCl}_3$ )**  $\delta$  4.99 (brt,  $J = 2.2$  Hz, 1H), 4.85 (t,  $J = 2.0$  Hz, 1H), 3.95 (dd,  $J = 11.7, 4.8$  Hz, 1H), 3.53 (t,  $J = 10.0$  Hz, 1H), 2.36 – 2.32 (m, 1H), 2.31 – 2.28 (m, 1H), 2.23 (pd,  $J = 7.0, 2.5$  Hz, 1H), 2.08 (dt,  $J = 14.0, 3.1$  Hz, 1H), 1.90 (dtd,  $J = 12.6, 5.1, 2.5$  Hz, 1H), 1.85 (d,  $J = 10.1$  Hz, 1H), 1.65 – 1.59 (m, 1H), 1.48 (dq,  $J = 12.5, 3.2$  Hz, 1H), 1.36 – 1.28 (m, 1H), 1.27 – 1.24 (m, 1H), 1.06 (td,  $J = 13.6, 4.1$  Hz, 1H), 0.95 (d,  $J = 7.1$  Hz, 3H), 0.88 (s, 3H), 0.86 (d,  $J = 6.9$  Hz, 3H);  **$^{13}\text{C}$  NMR (125 MHz,  $\text{CDCl}_3$ )**  $\delta$  145.44, 114.17, 68.15, 67.14, 61.62, 49.09, 40.09, 34.38, 31.08, 29.74, 26.43, 21.32, 20.91, 18.05, 16.22; **IR (ATR, neat)**  $\nu_{\max}$  3379, 2954, 2869, 1724, 1647, 1460, 1244, 1247, 1173, 1031, 878  $\text{cm}^{-1}$ ; **HRMS (ESI):** calcd. for  $\text{C}_{15}\text{H}_{25}\text{O}$  ( $\text{M}-\text{H}_2\text{O}+\text{H}$ )<sup>+</sup>  $m/z$  221.1899 found  $m/z$  221.1899;  $[\alpha]_{\text{D}}^{25} +33.2$  ( $c$  0.41,  $\text{CHCl}_3$ ).

### 3. Spectroscopic data

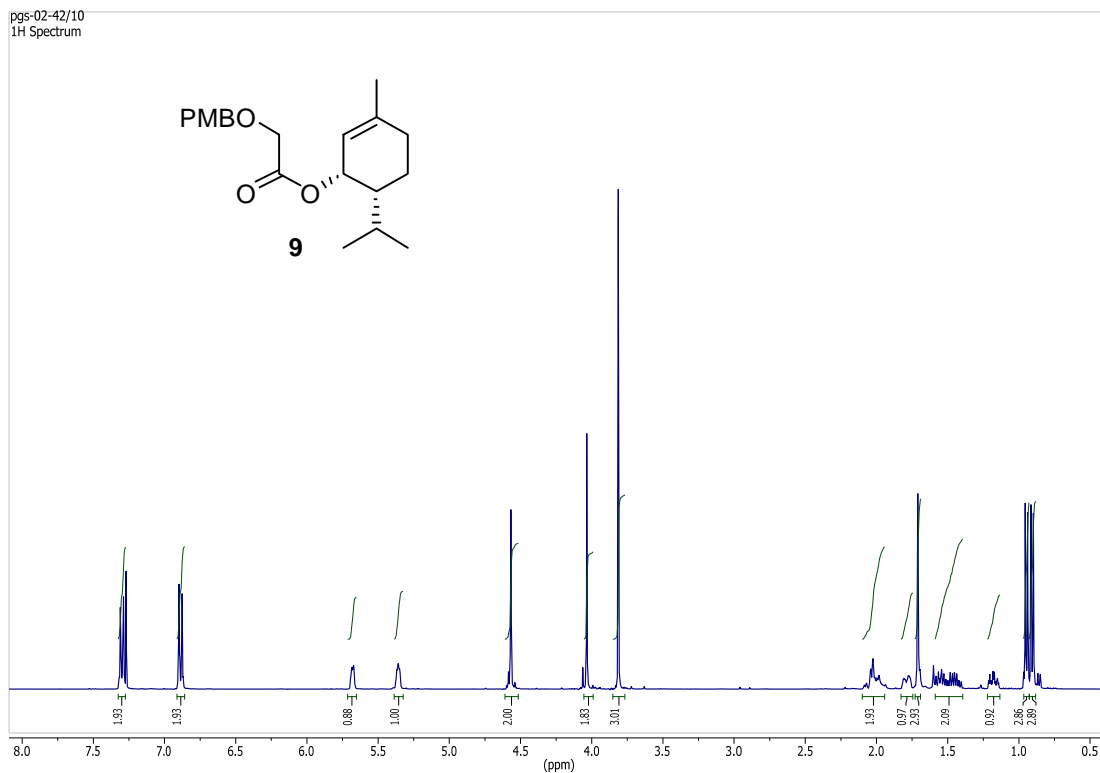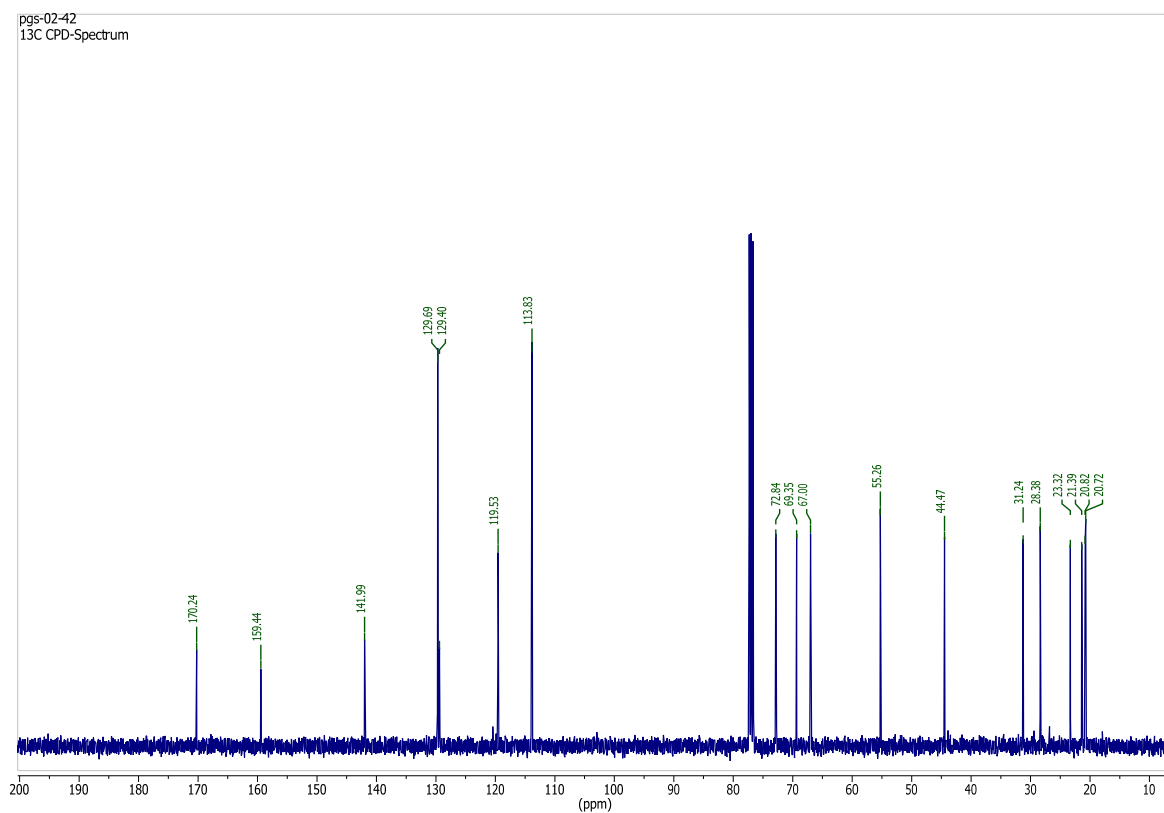

pgs-02-43  
1H Spectrum

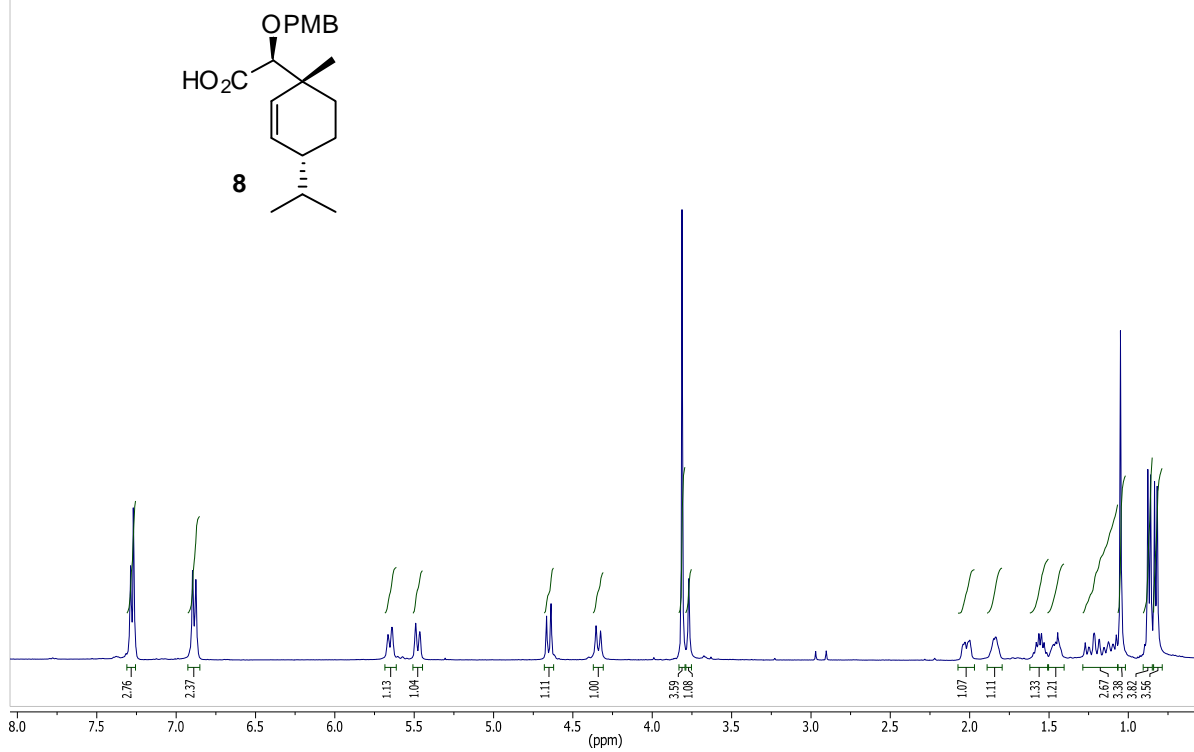

pgs-02-43/11  
13C CPD-Spectrum

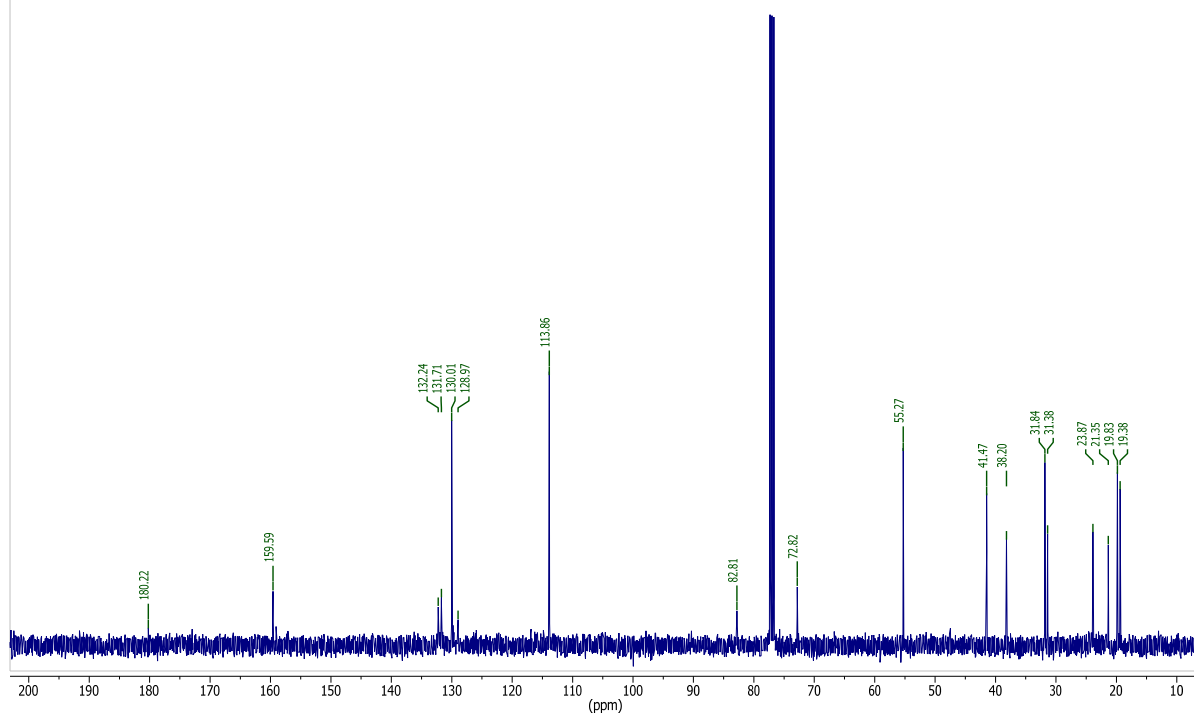

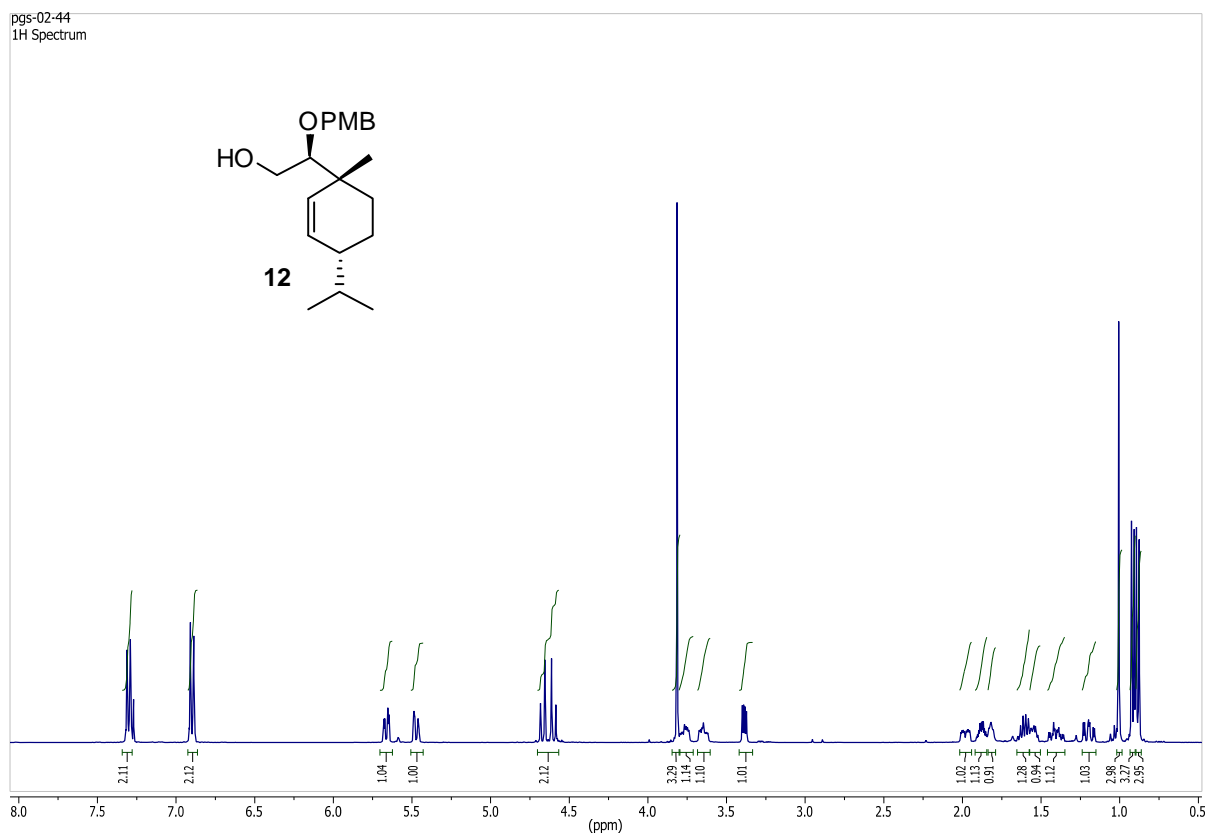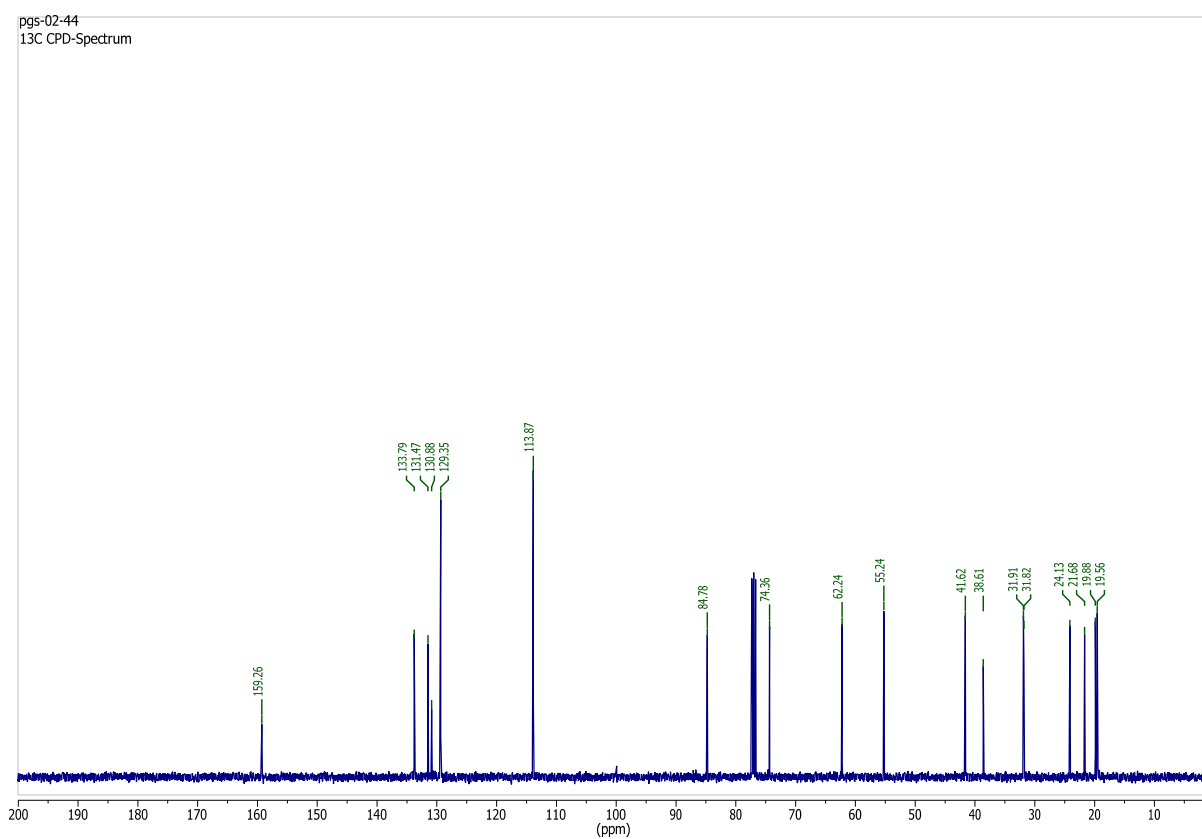

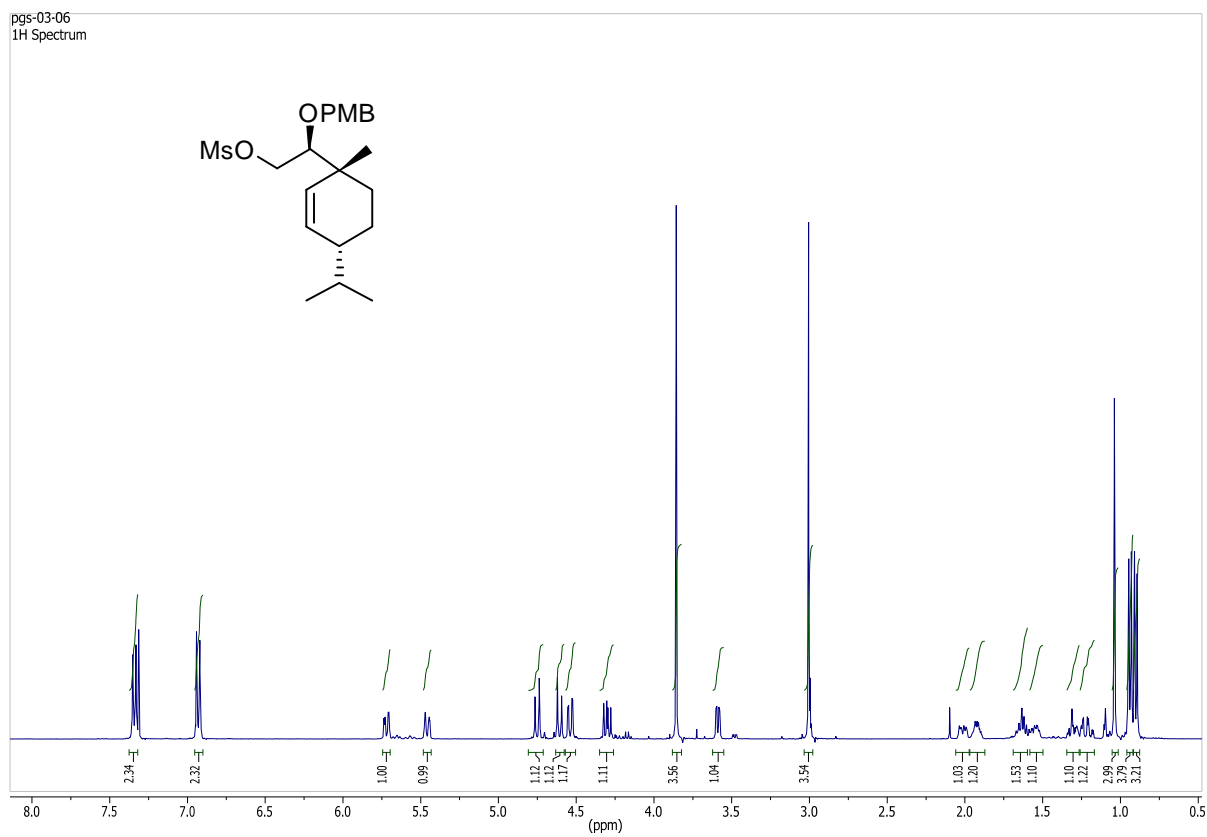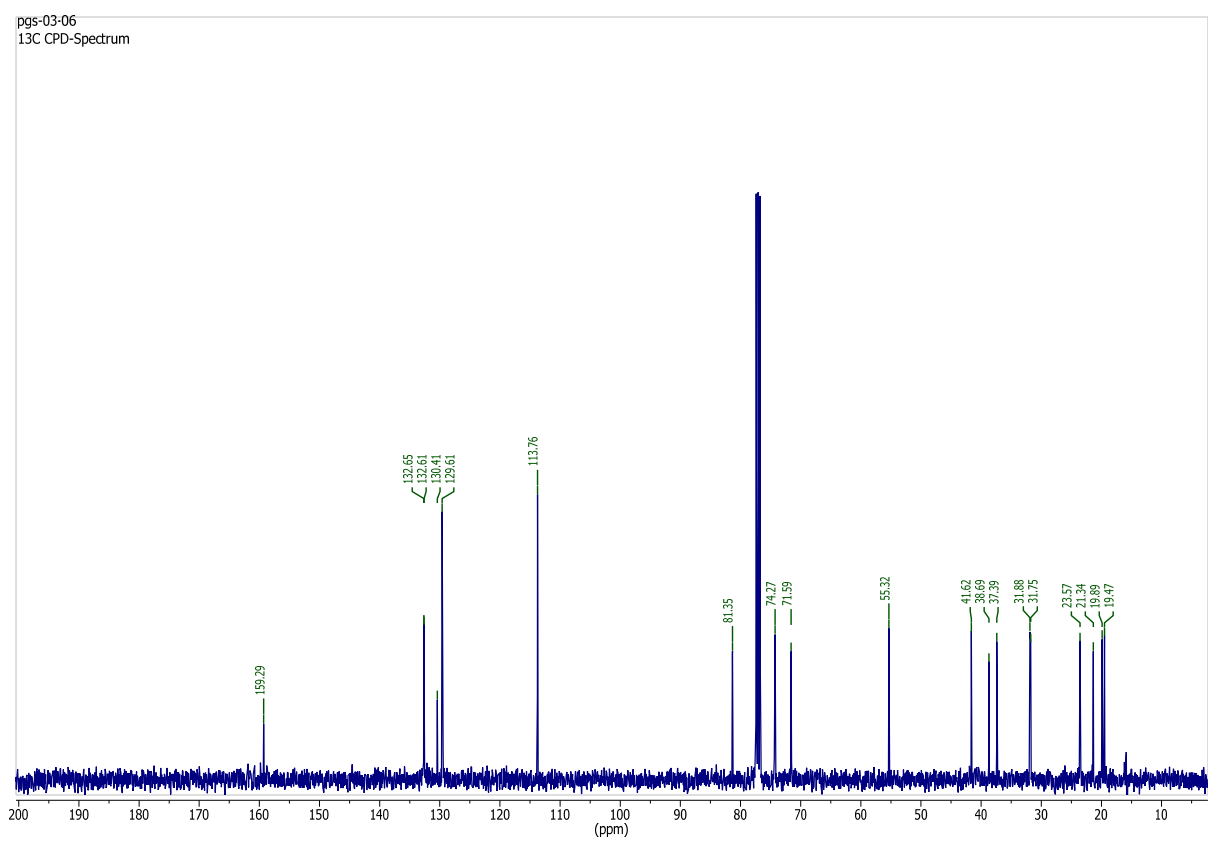



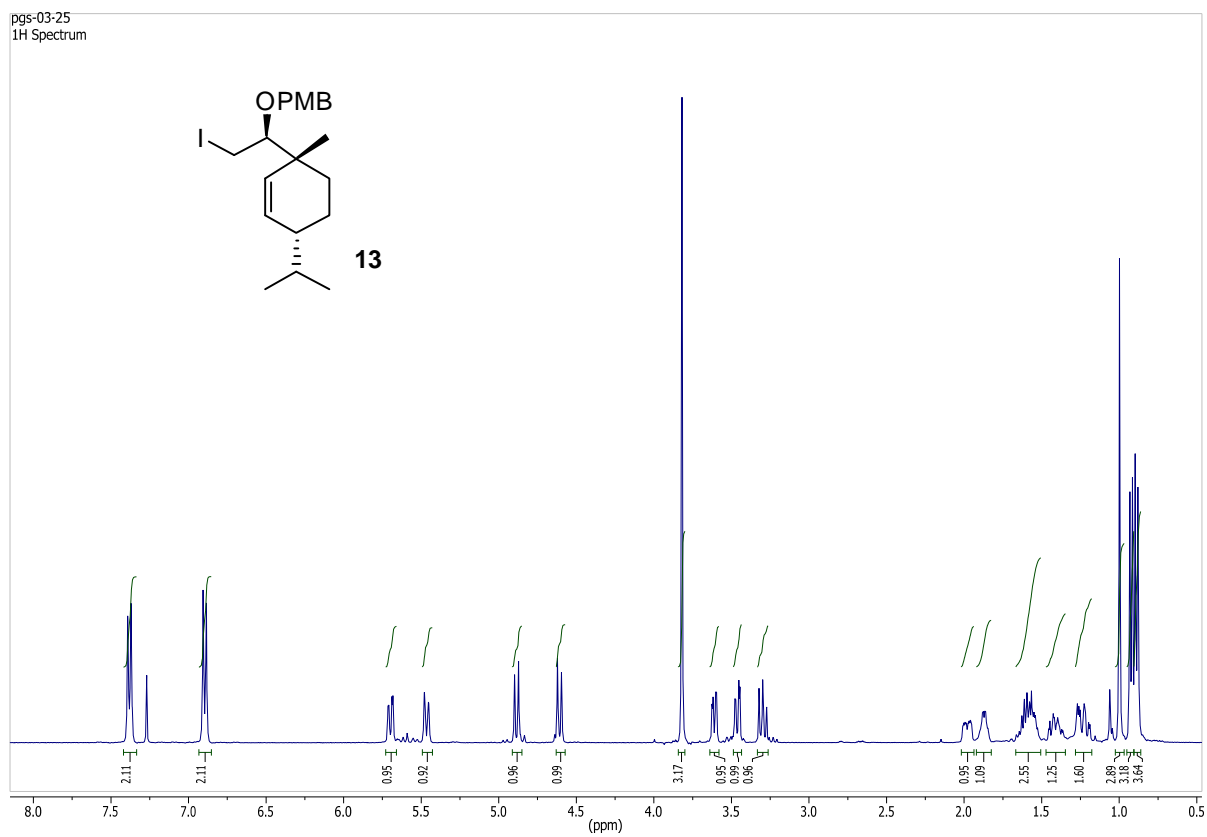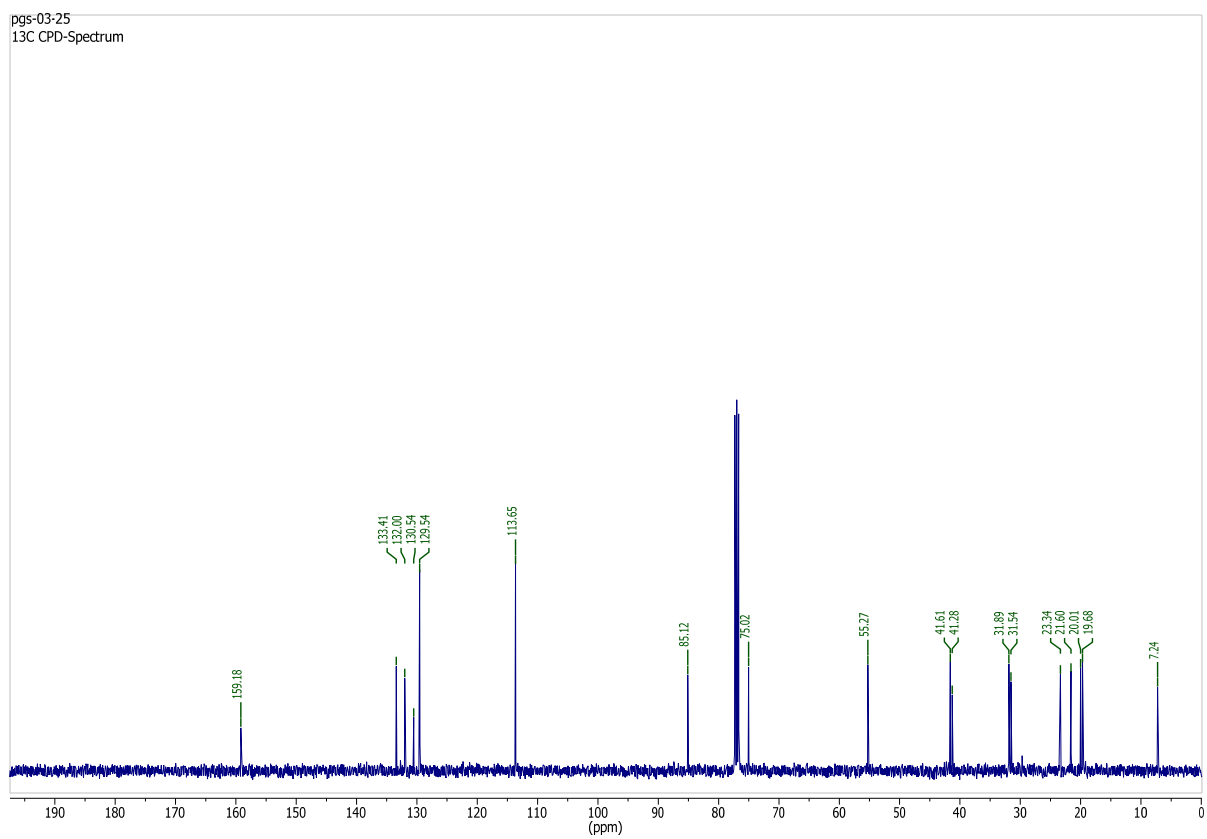

pgs-03-01  
1H Spectrum

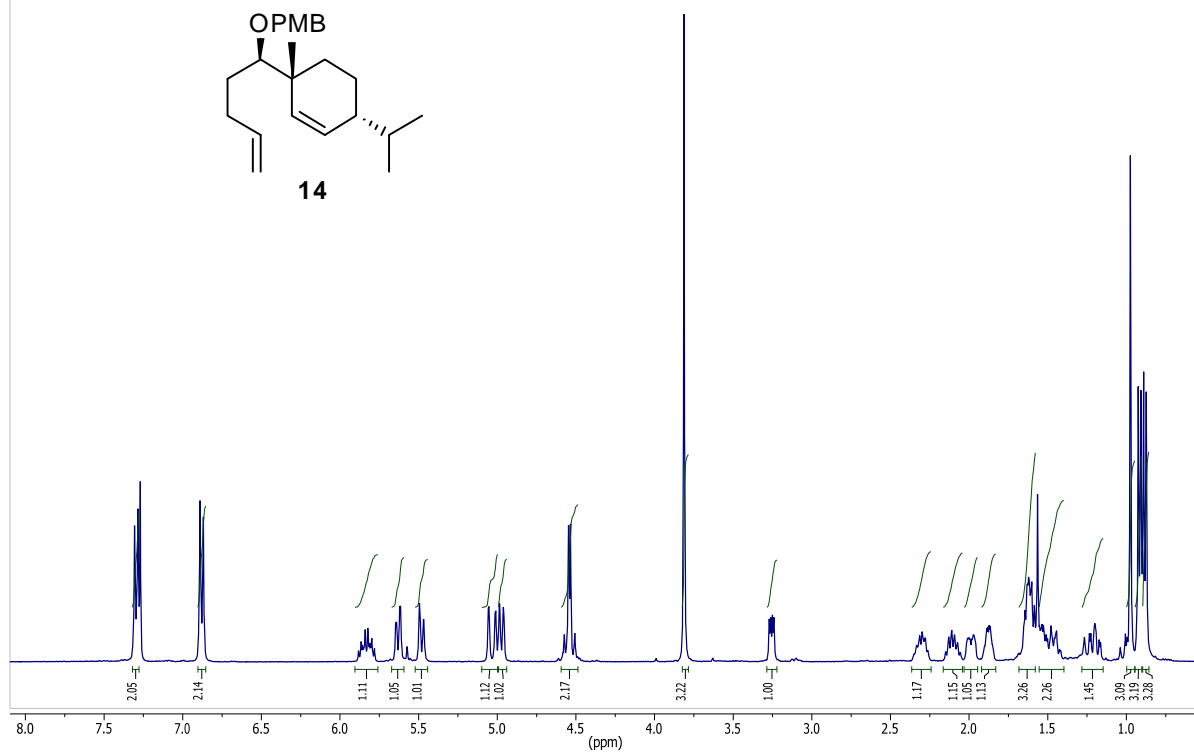

pgs-03-17  
13C CPD-Spectrum

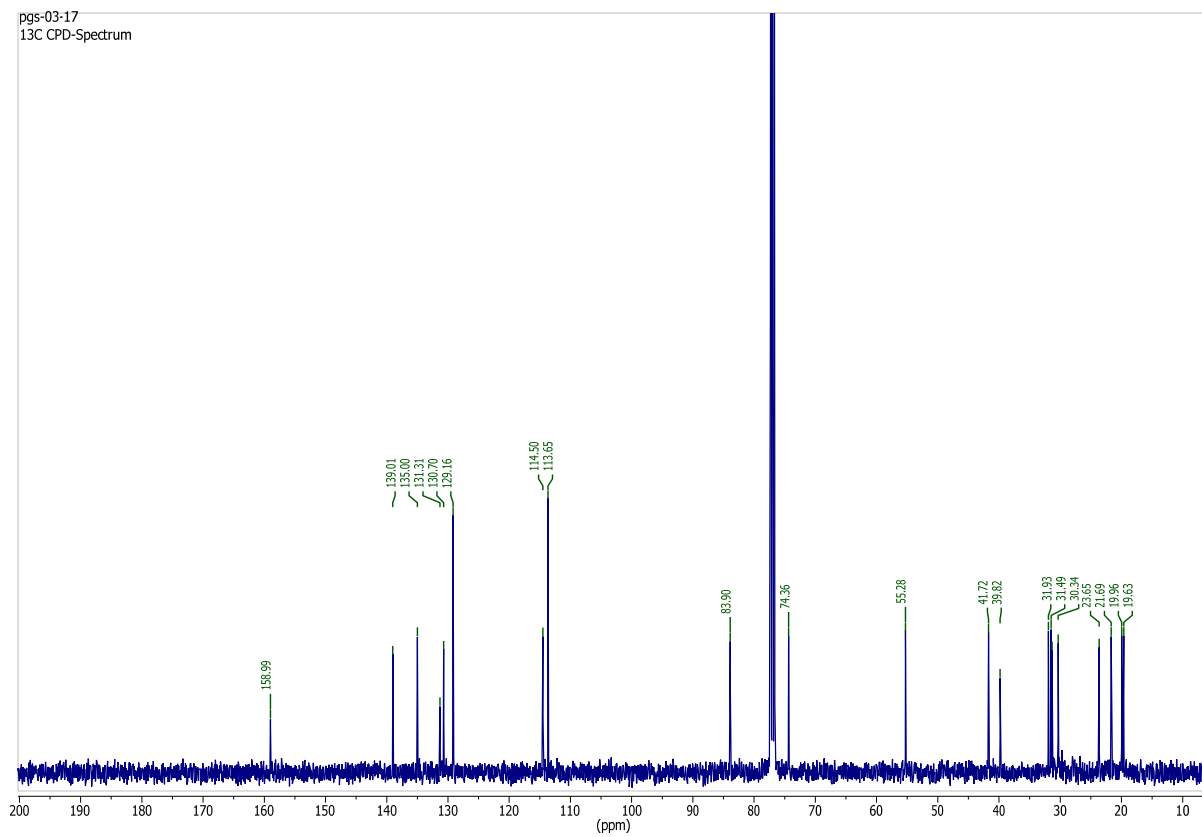

pgs-02-91/11  
1H Spectrum

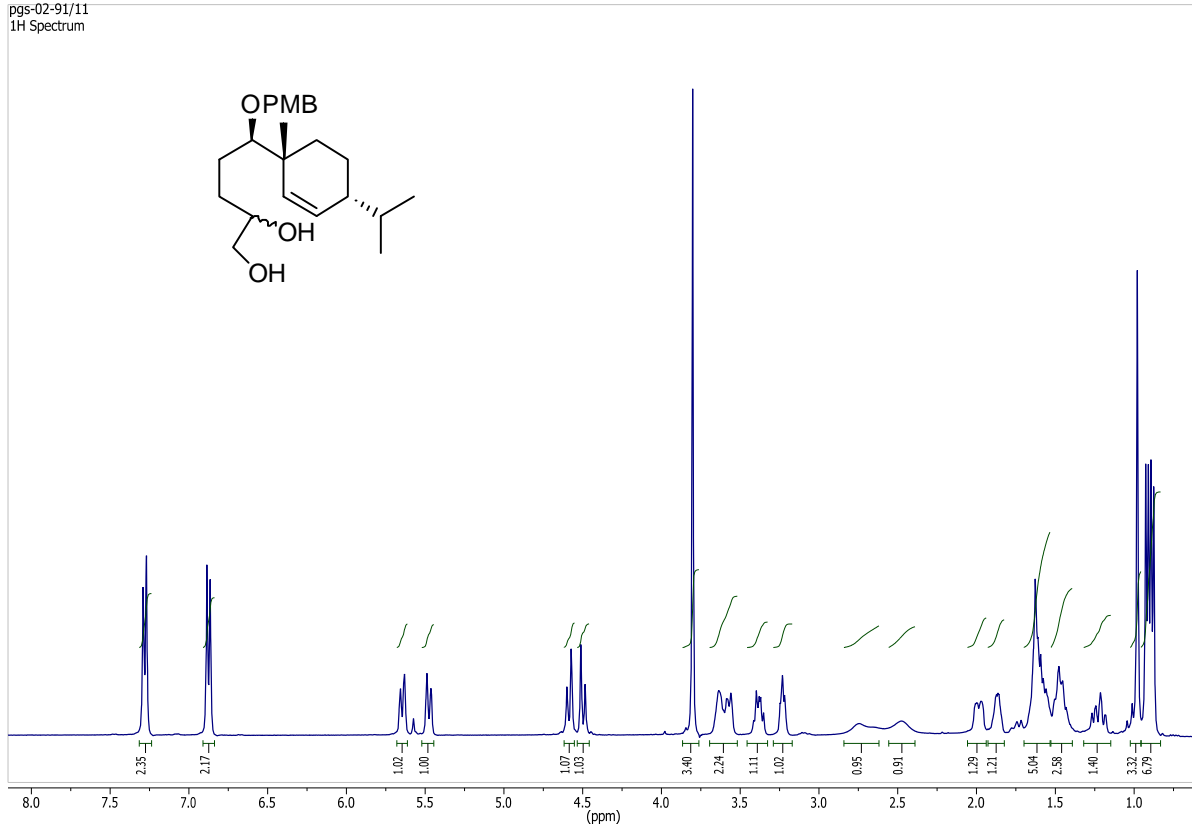

pgs-02-91/10  
13C CPD-Spectrum

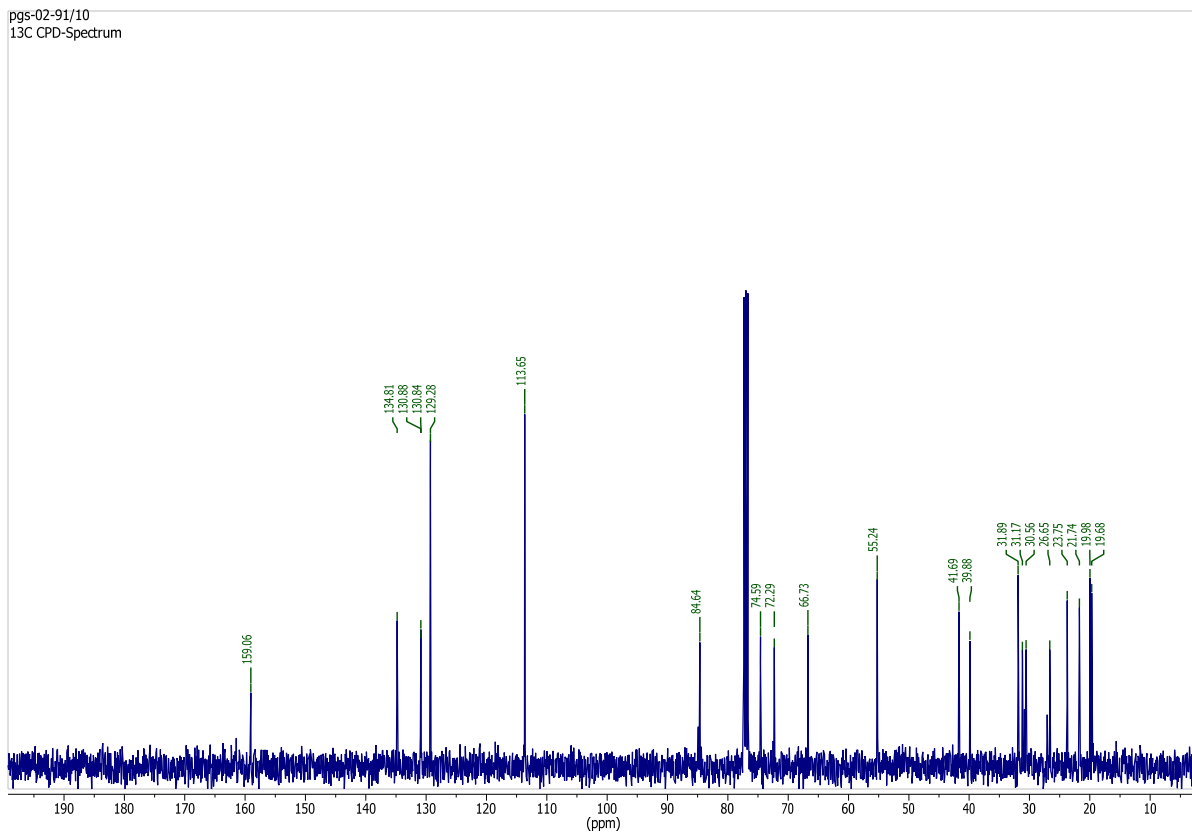

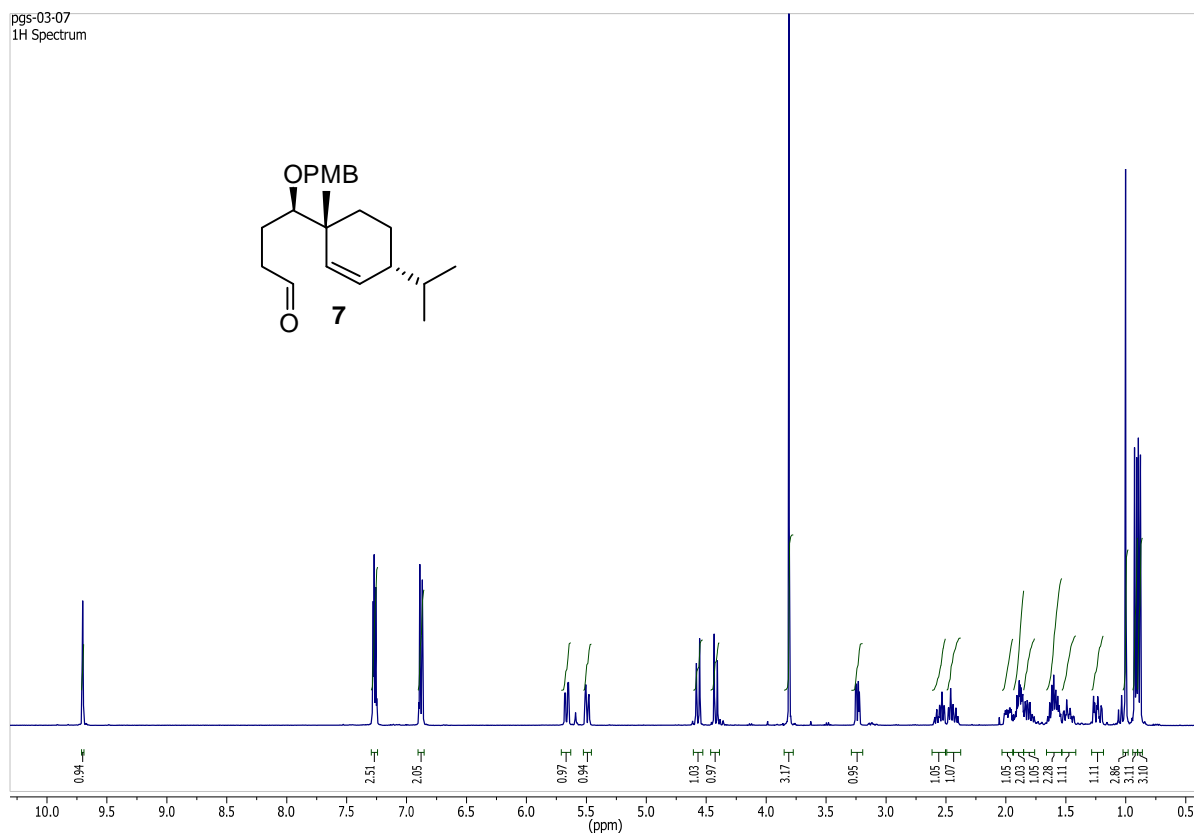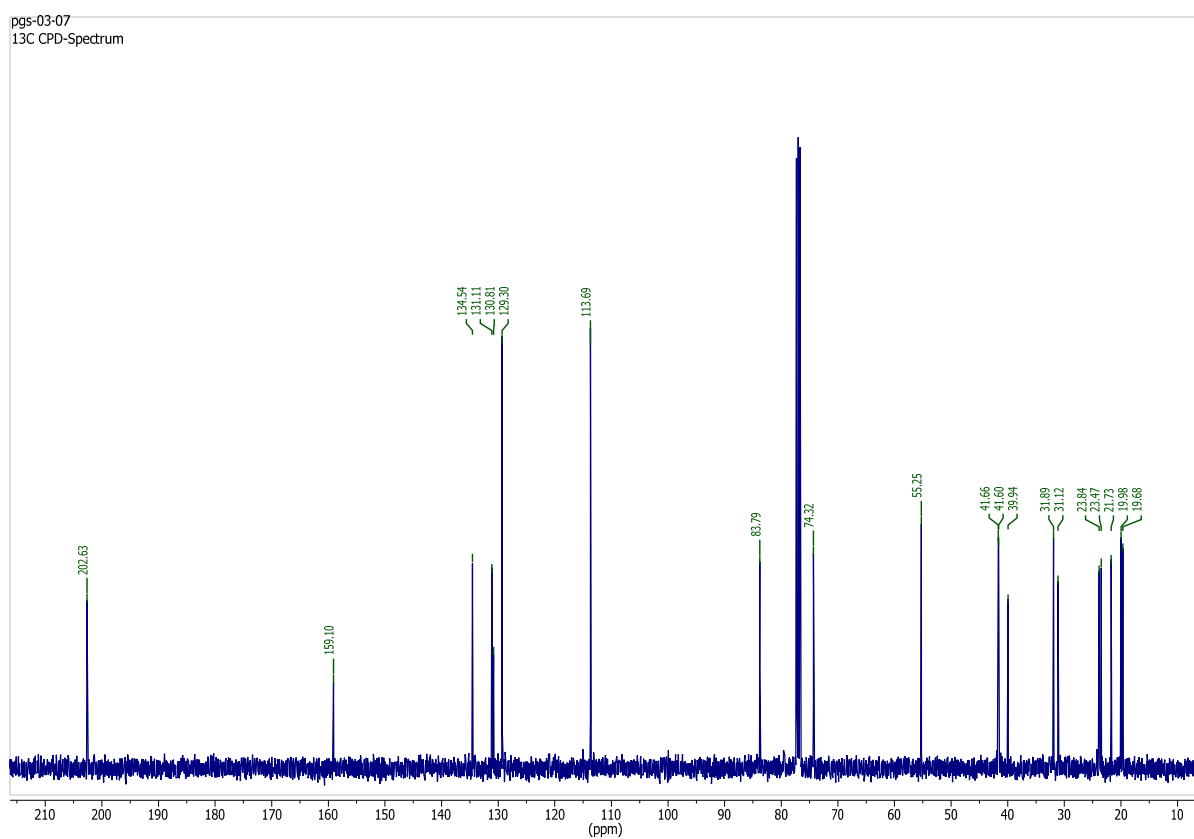

PGS-02072cyc  
PROTON CDCl3 /opt/topspin nmr 8

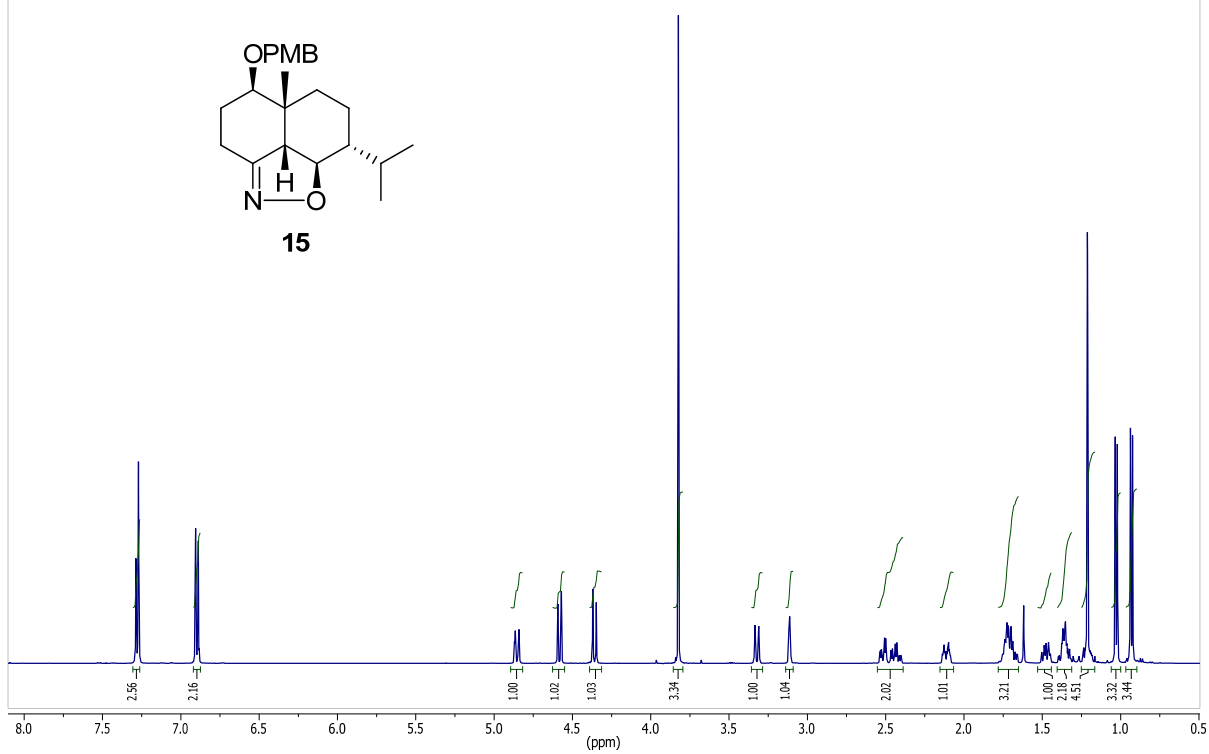

pgs-02-72-cyclic  
13C CPD-Spectrum

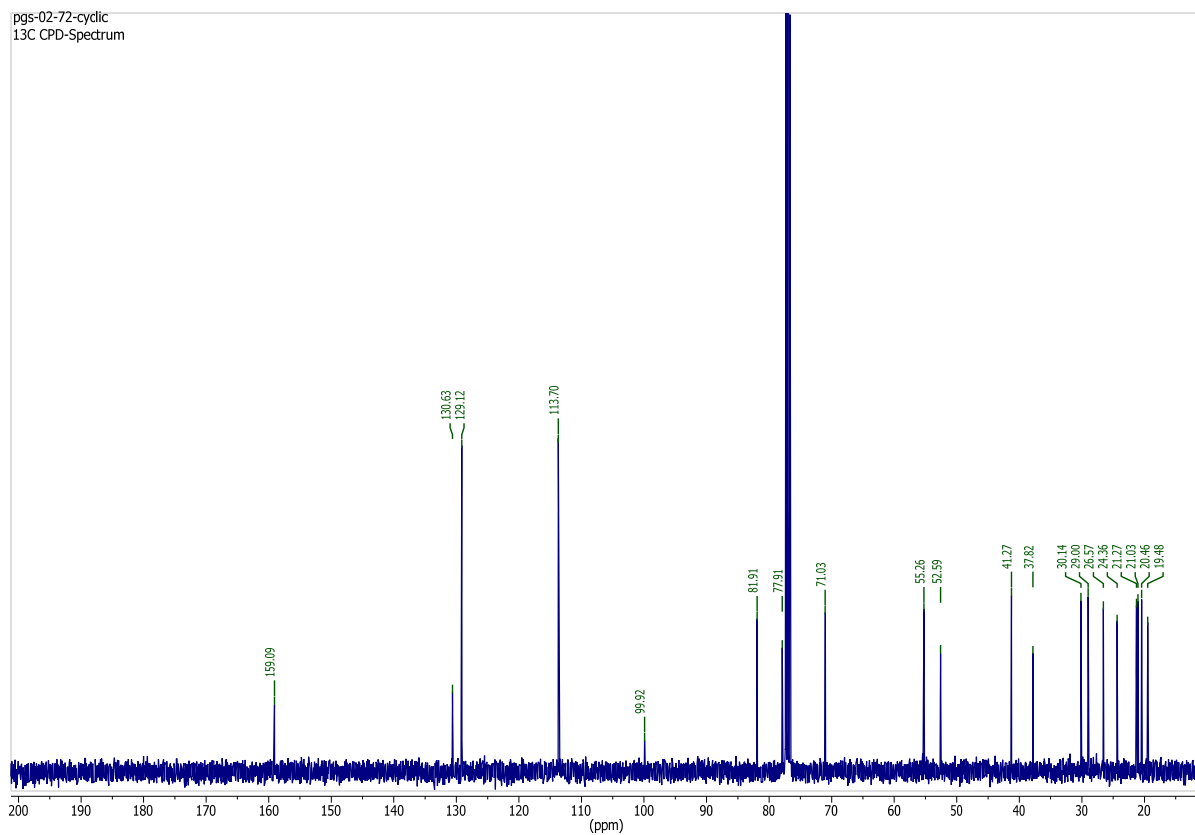

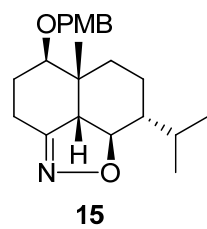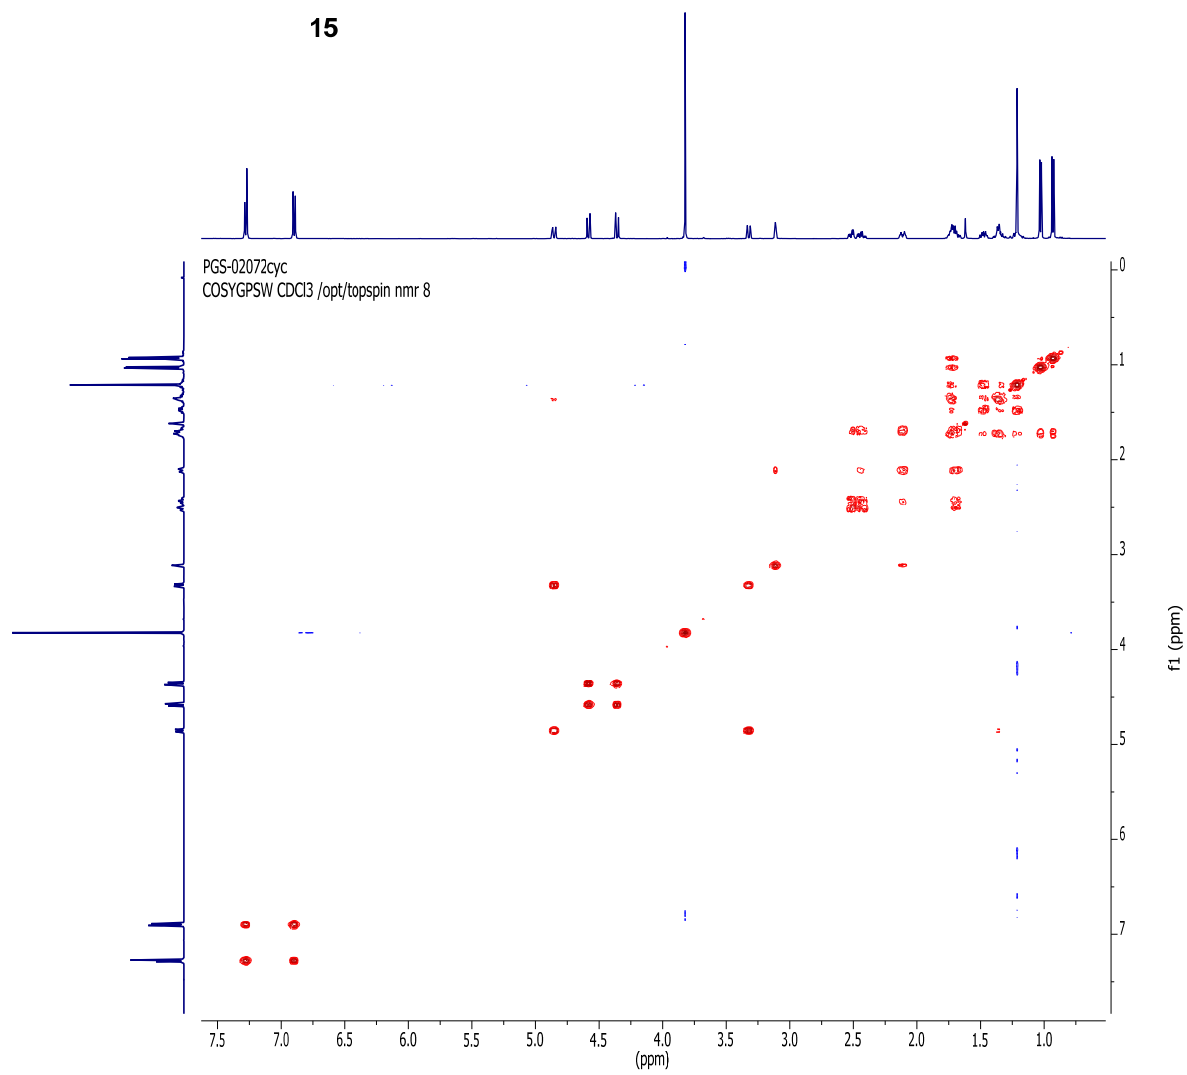

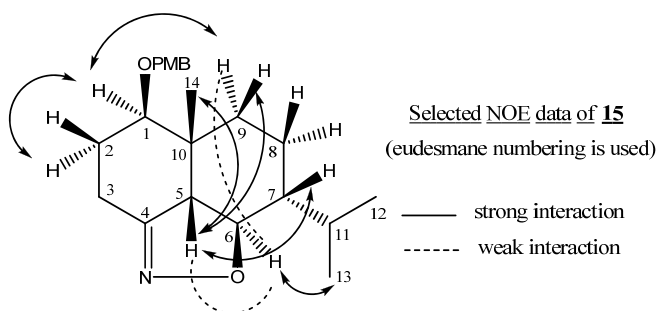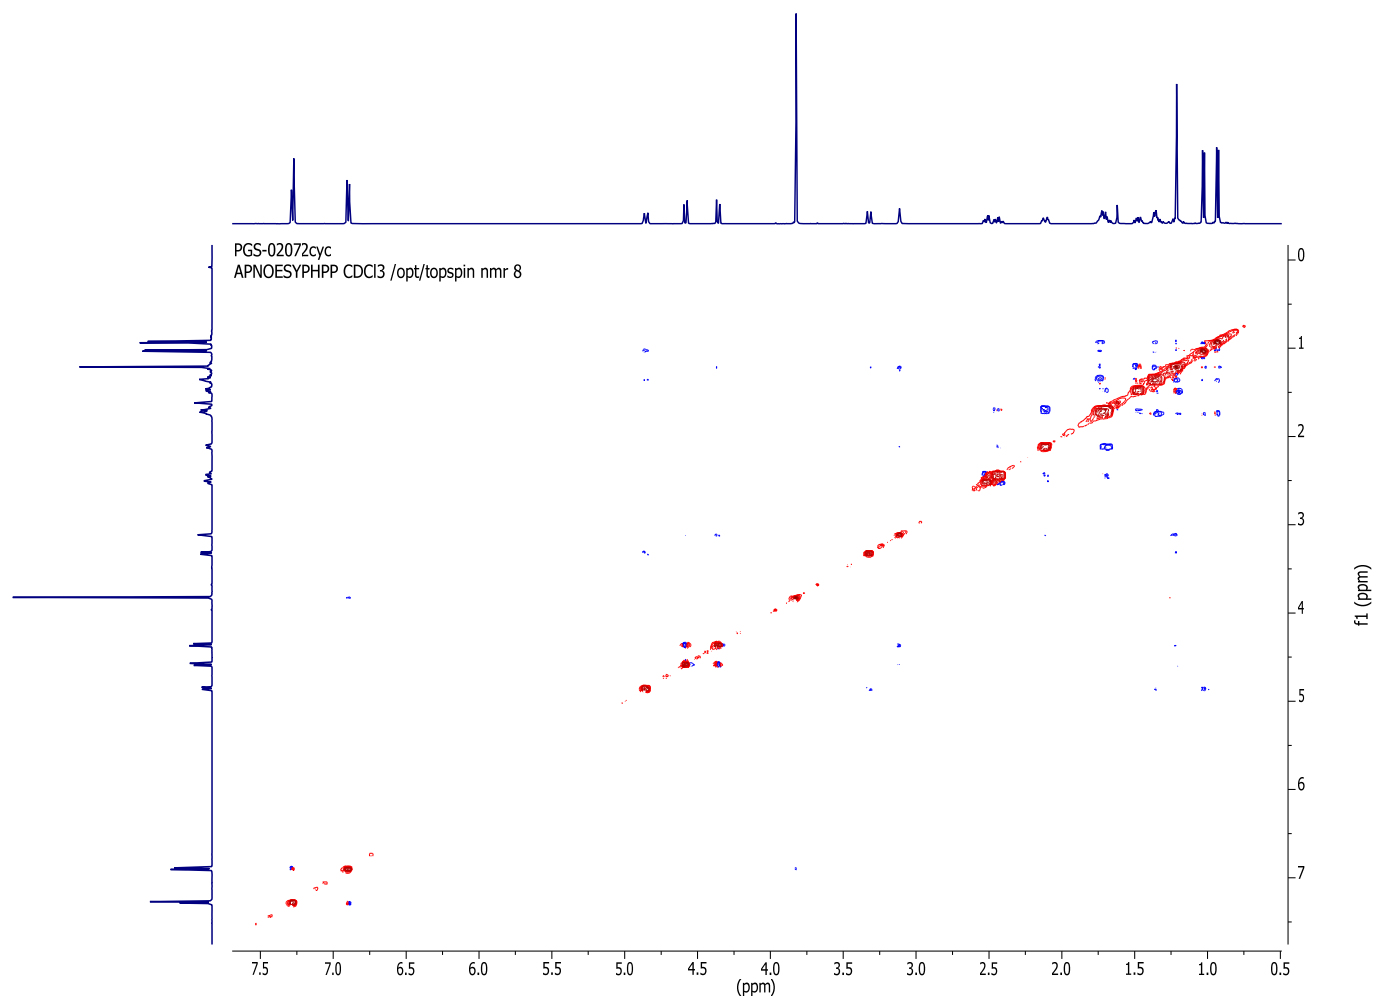

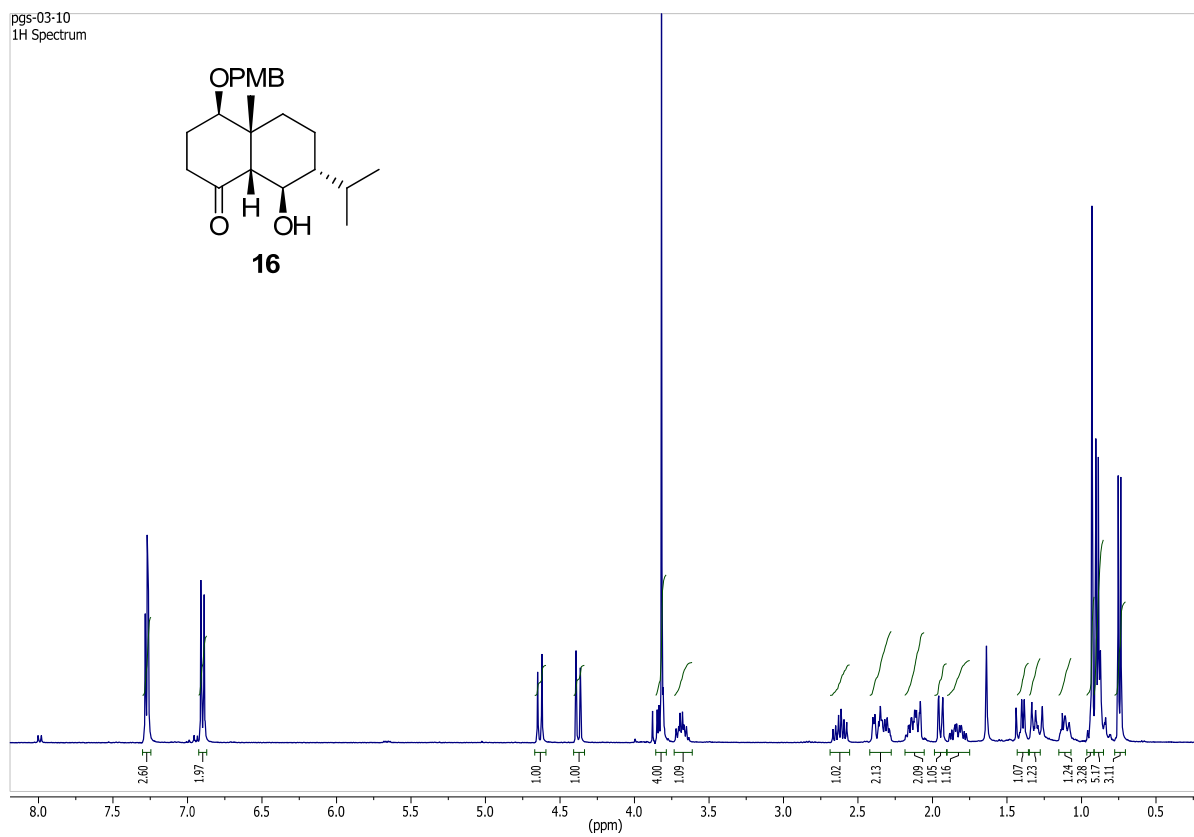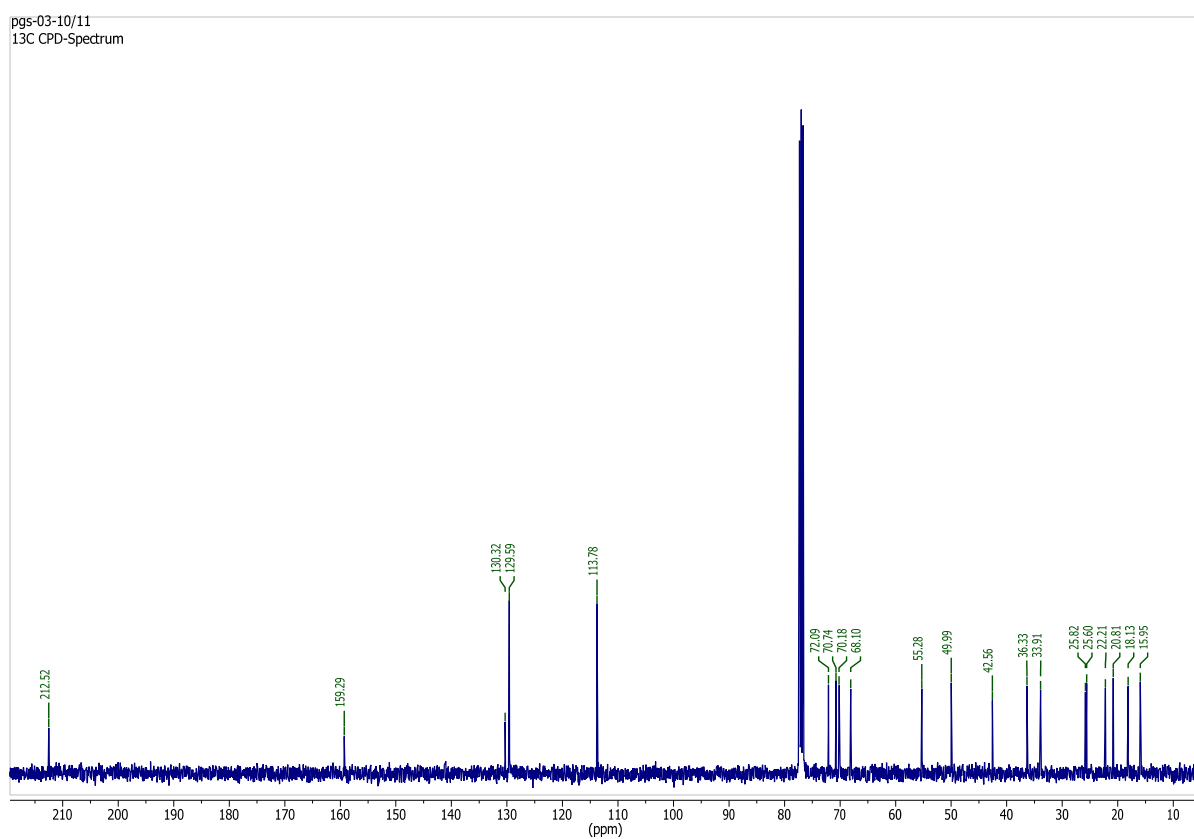



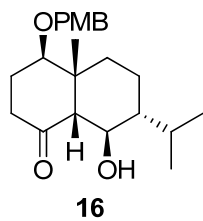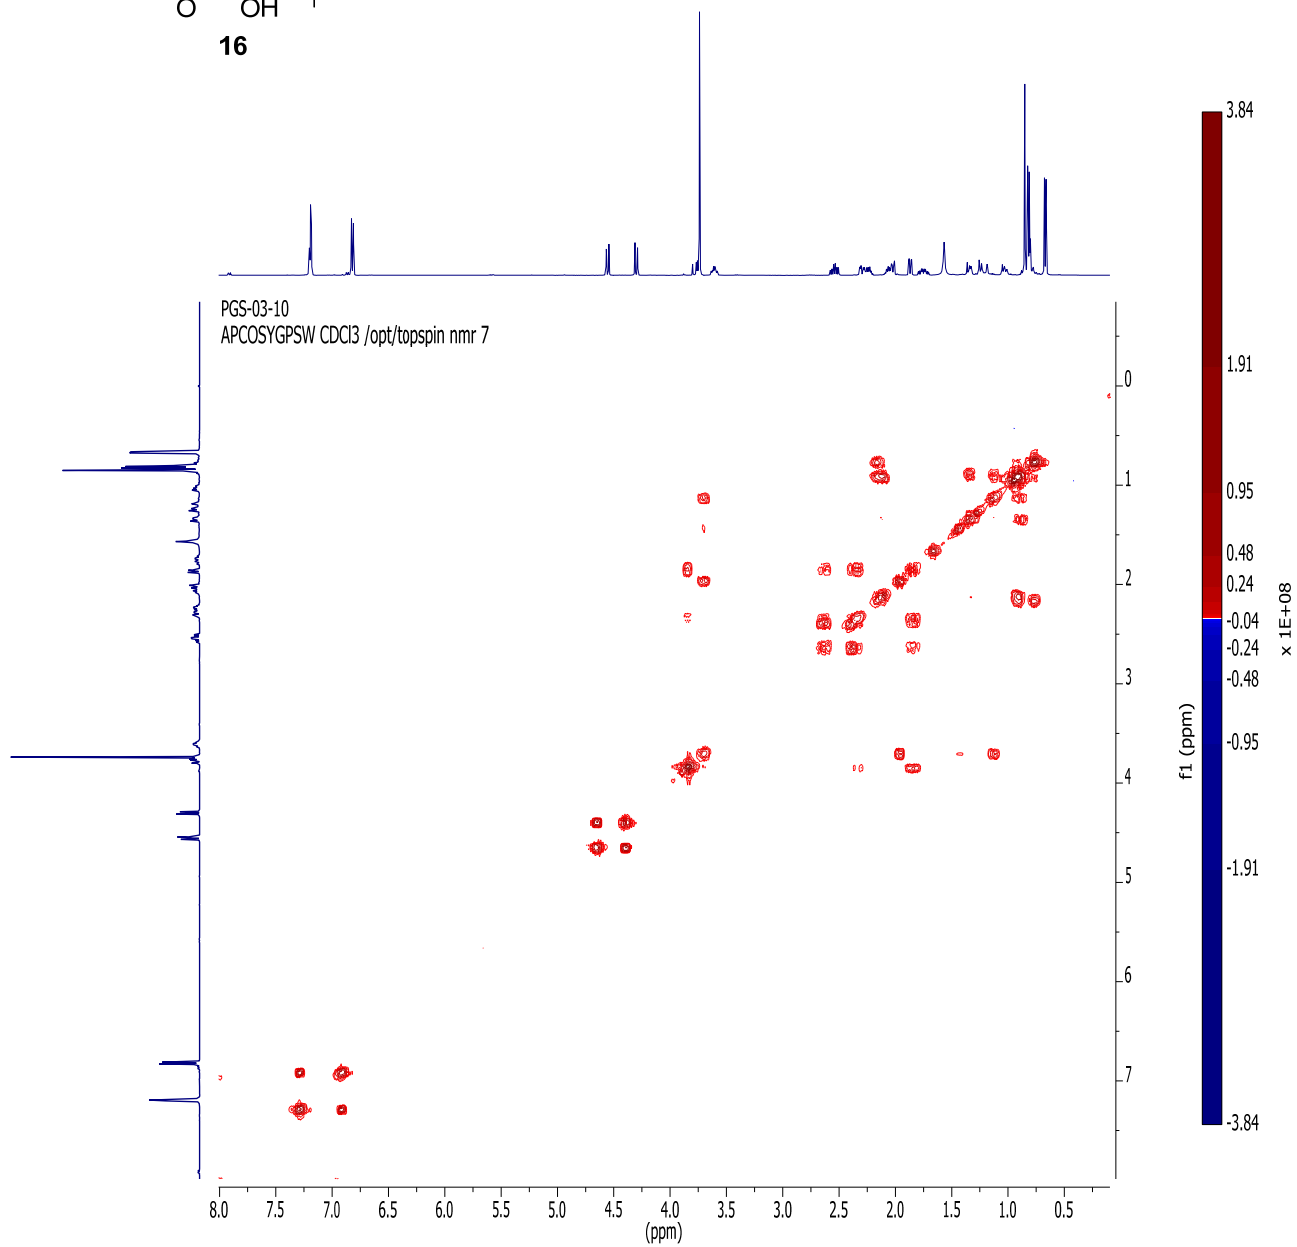

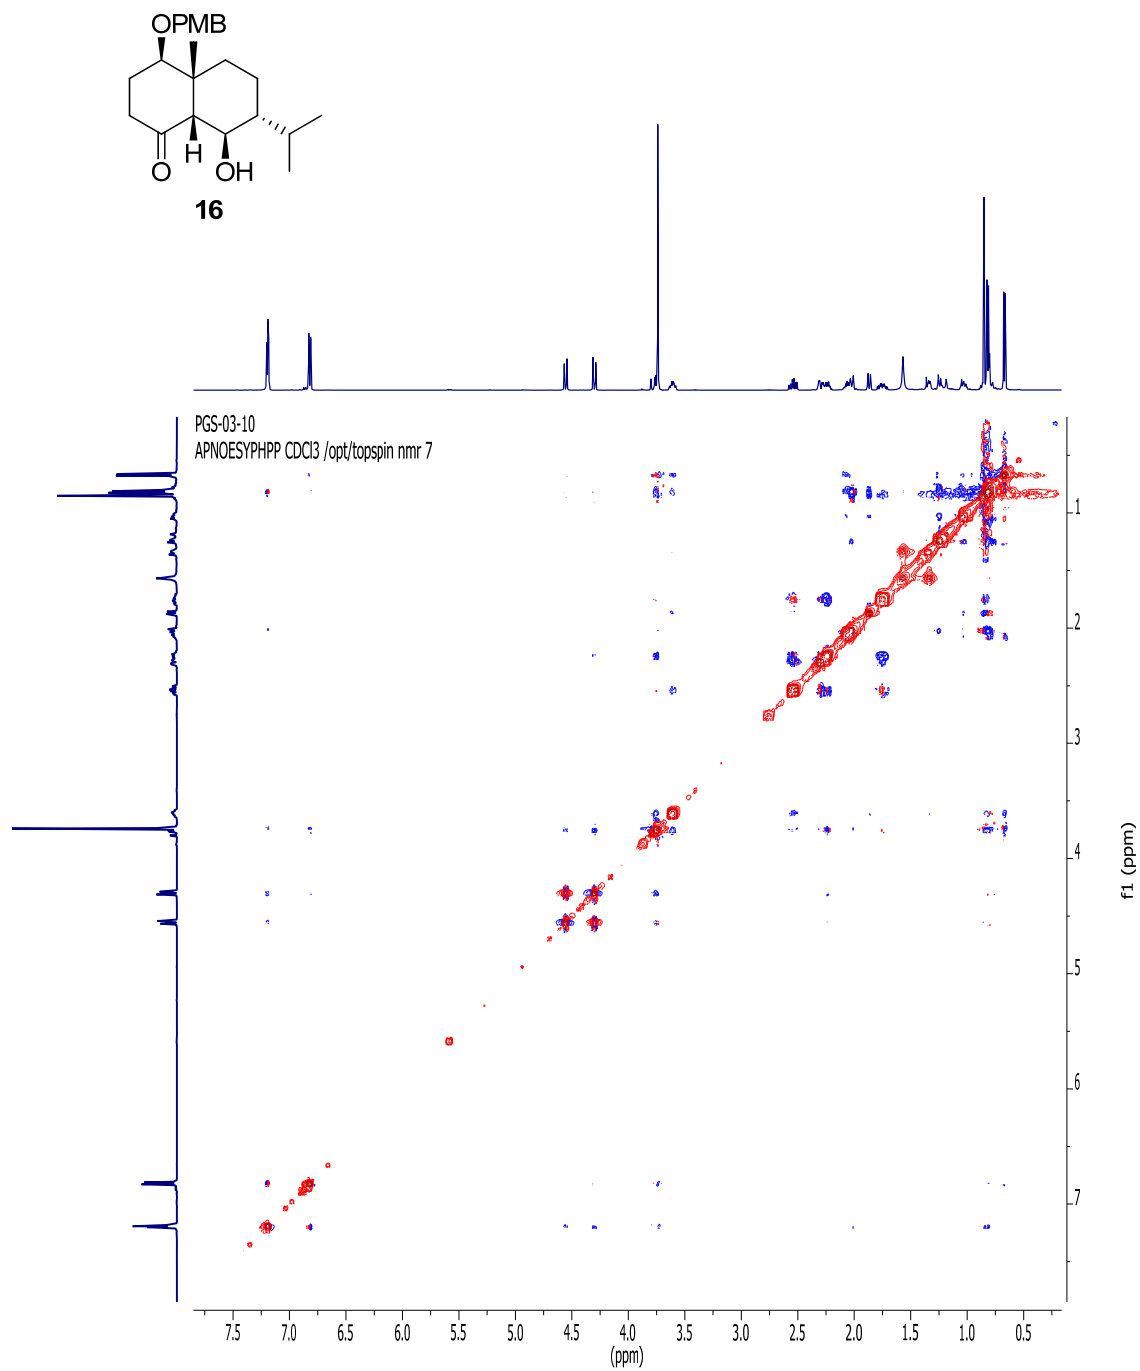

pgs-03-68-IIBATCH

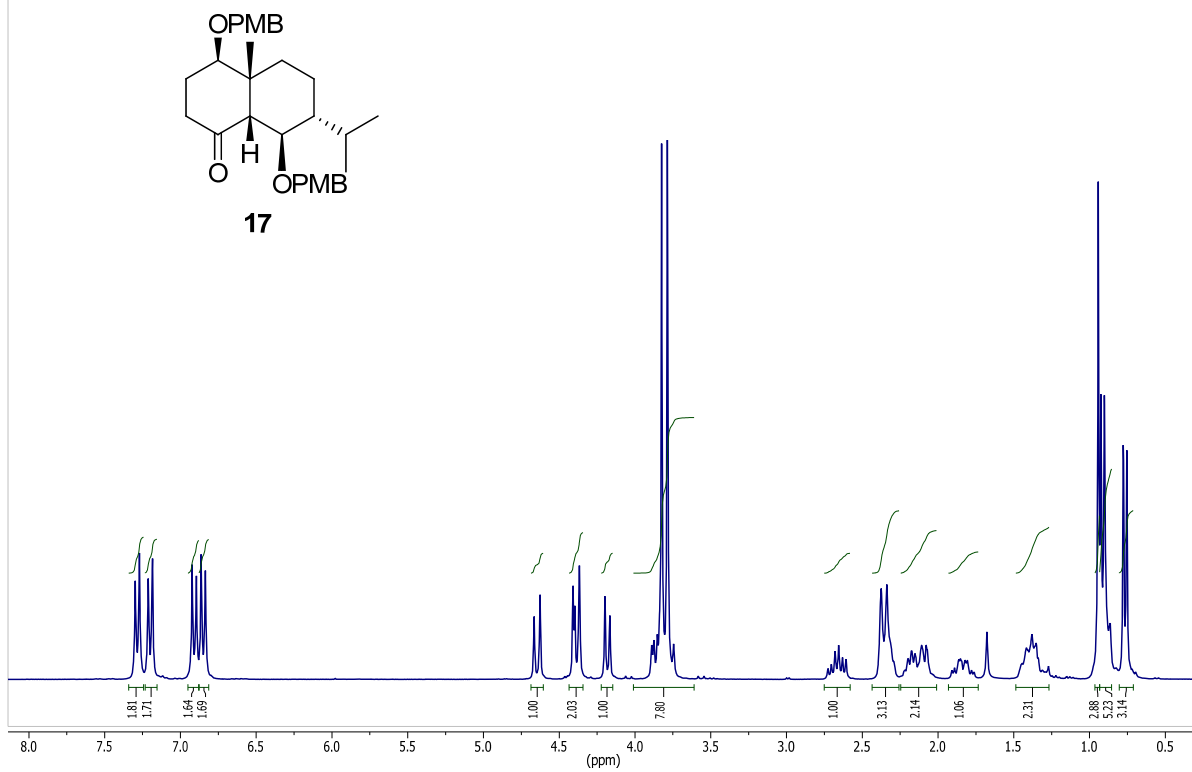

pgs-03-68-IIBATCH

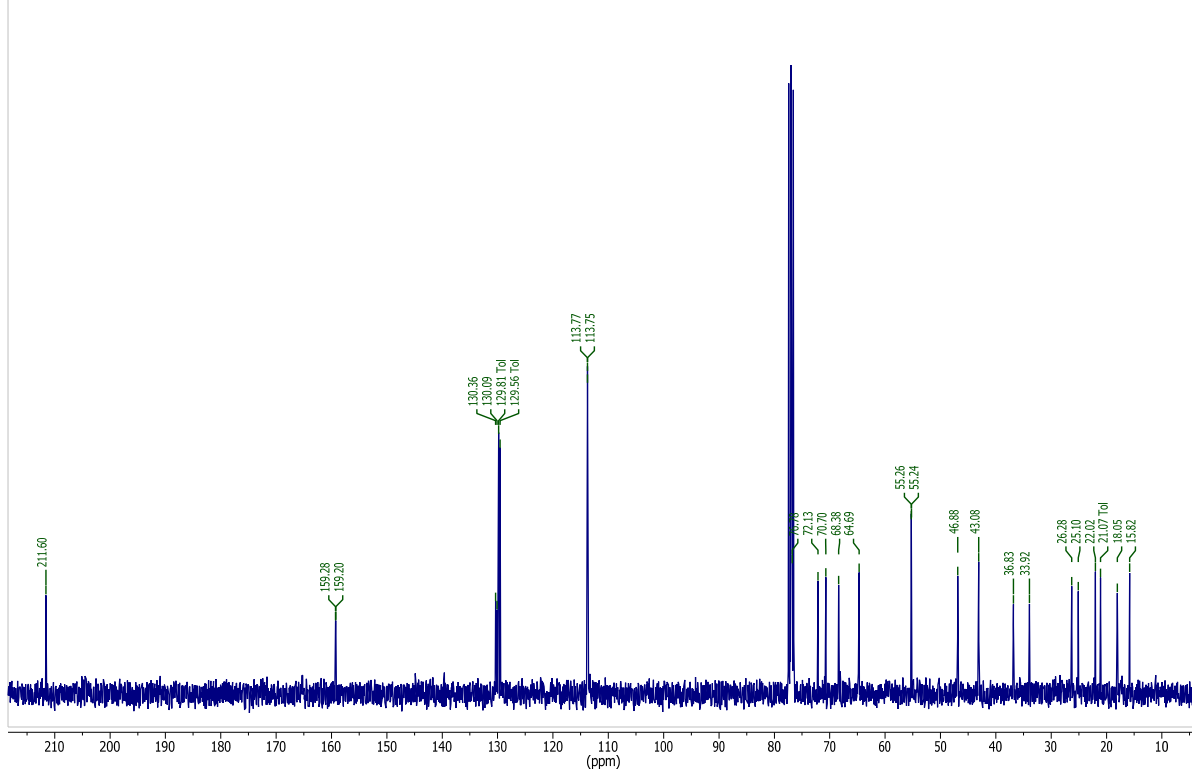

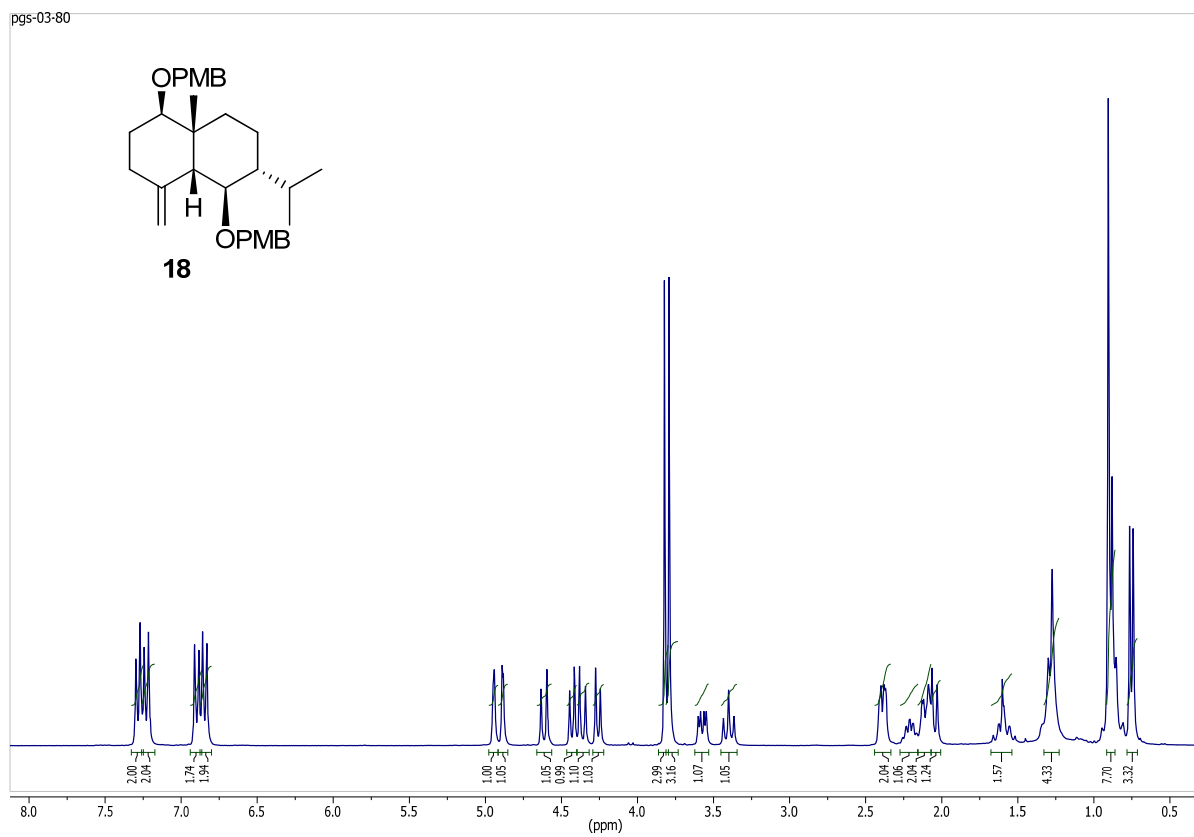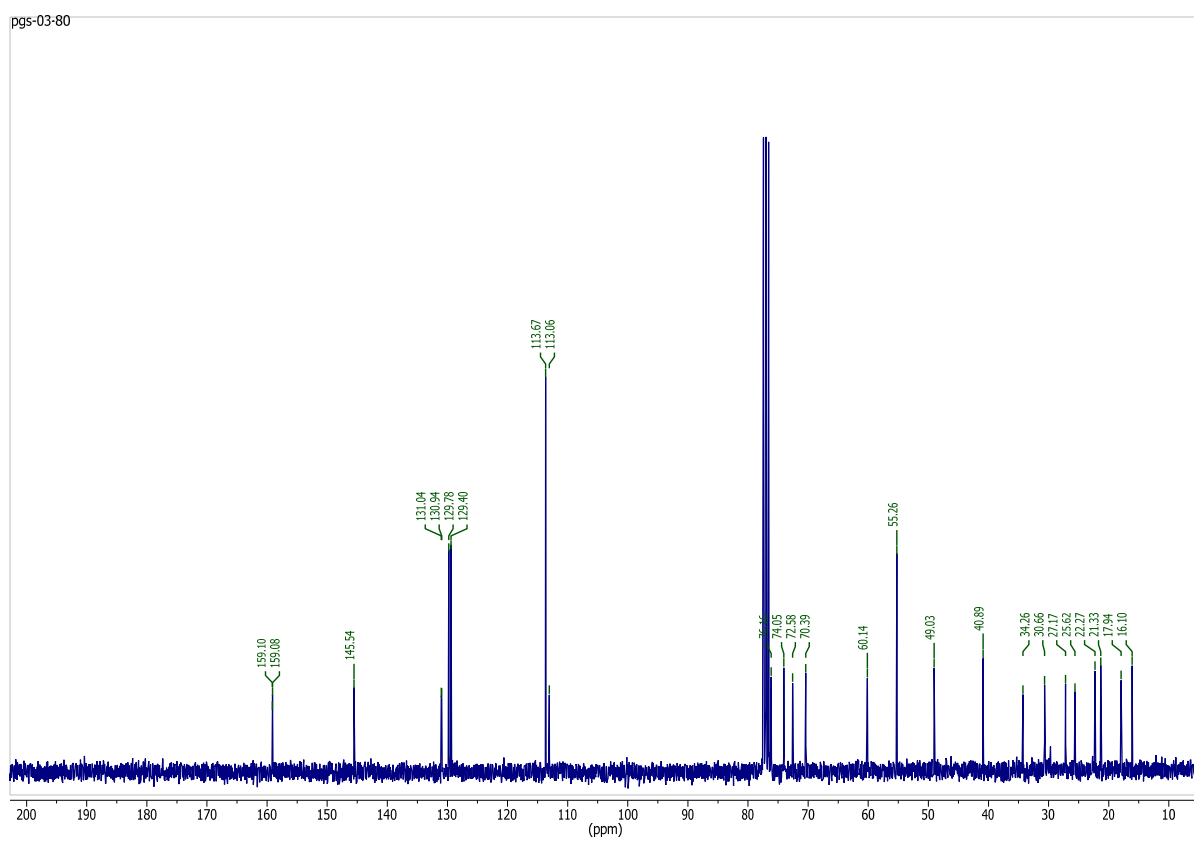

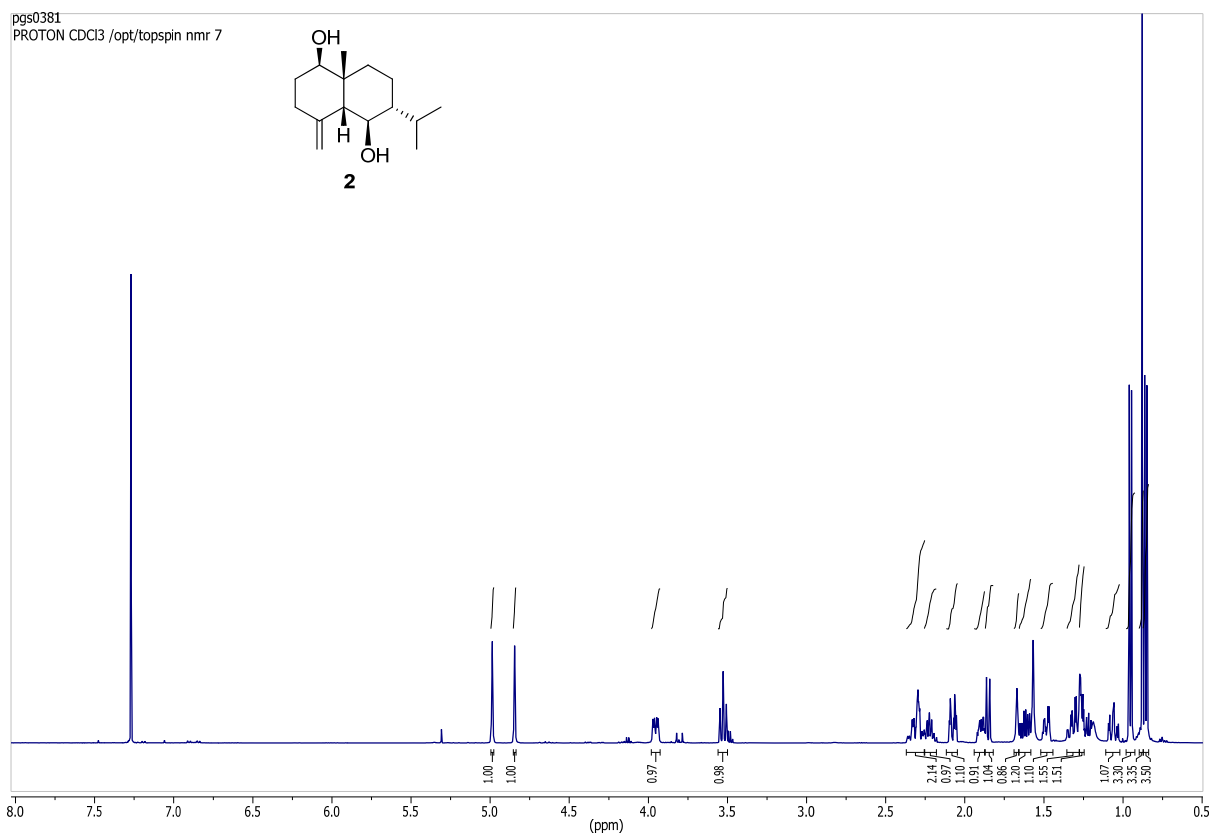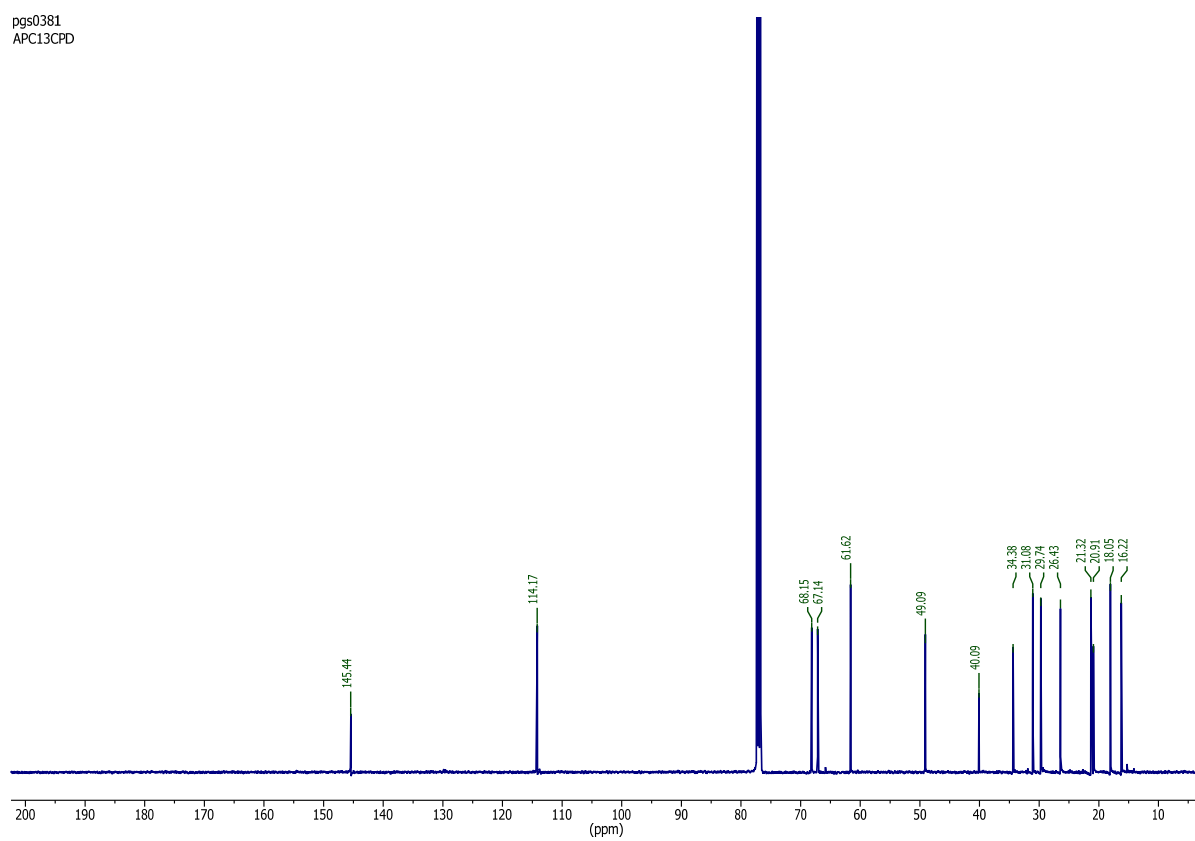

### Comparison table of characterization data

#### <sup>1</sup>H NMR

| Synthetic (500 MHz, CDCl <sub>3</sub> )      | Isolated <sup>i</sup> (500 MHz, CDCl <sub>3</sub> ) | Isolated <sup>ii</sup> (500 MHz, CDCl <sub>3</sub> ) |
|----------------------------------------------|-----------------------------------------------------|------------------------------------------------------|
| 4.99 (brt, <i>J</i> = 2.2 Hz, 1H)            | 4.95 (brt, <i>J</i> = 2.1 Hz, 1H)                   | 4.97 (s, 1H)                                         |
| 4.85 (t, <i>J</i> = 2.0 Hz, 1H)              | 4.81 (brt, <i>J</i> = 2.0 Hz, 1H)                   | 4.83 (s, 1H)                                         |
| 3.95 (dd, <i>J</i> = 11.7, 4.8 Hz, 1H)       | 3.92 (dd, <i>J</i> = 11.6, 4.8 Hz, 1H)              | 3.94 (dd, <i>J</i> = 11.7, 4.9 Hz, 1H)               |
| 3.53 (t, <i>J</i> = 10.0 Hz, 1H)             | 3.49 (t, <i>J</i> = 10.0 Hz, 1H)                    | 3.51 (t, <i>J</i> = 10.2 Hz, 1H)                     |
| 2.36 – 2.32 (m, 1H)                          | 2.27 (m, 1H)                                        | 2.28 (m, 1H)                                         |
| 2.31 – 2.28 (m, 1H)                          | 2.27 (m, 1H)                                        | 2.28 (m, 1H)                                         |
| 2.23 (sed, <i>J</i> = 7.0, 2.5 Hz, 1H)       | 2.19 (sed, <i>J</i> = 7.1, 2.5 Hz, 1H)              | 2.26 (sed, <i>J</i> = 7.1, 2.1 Hz, 1H)               |
| 2.08 (dt, <i>J</i> = 14.0, 3.1 Hz, 1H)       | 2.04 (dt, <i>J</i> = 14.0, 3.2 Hz, 1H)              | 2.06 (dt, <i>J</i> = 13.8, 3.0 Hz, 1H)               |
| 1.90 (dtd, <i>J</i> = 12.6, 5.1, 2.5 Hz, 1H) | 1.86 (dtd, <i>J</i> = 12.5, 5.2, 2.7 Hz, 1H)        | 1.86 (m, 1H)                                         |
| 1.85 (d, <i>J</i> = 10.1 Hz, 1H)             | 1.82 (d, <i>J</i> = 10.2 Hz, 1H)                    | 1.84 (d, <i>J</i> = 10.2 Hz, 1H)                     |
| 1.65 – 1.59 (m, 1H)                          | 1.58 (qd, <i>J</i> = 12.2, 5.7 Hz, 1H)              | 1.60 (qd, <i>J</i> = 11.7, 5.8 Hz, 1H)               |
| 1.48 (dq, <i>J</i> = 12.5, 3.2 Hz, 1H)       | 1.45 (dq, <i>J</i> = 13.4, 3.4 Hz, 1H)              | 1.45 (dq, <i>J</i> = 13.5, 3.4 Hz, 1H)               |
| 1.36 – 1.28 (m, 1H)                          | 1.26 (qd, <i>J</i> = 12.9, 3.2 Hz, 1H)              | 1.26 (qd, <i>J</i> = 12.9, 2.8 Hz, 1H)               |
| 1.27 – 1.24 (m, 1H)                          | 1.22 (tt, <i>J</i> = 12.5, 2.6 Hz, 1H)              | 1.22 (tt, <i>J</i> = 12.6, 2.8 Hz, 1H)               |
| 1.06 (td, <i>J</i> = 13.6, 4.1 Hz, 1H)       | 1.02 (td, <i>J</i> = 13.7, 3.9 Hz, 1H)              | 1.04 (td, <i>J</i> = 13.3, 3.4 Hz, 1H)               |
| 0.95 (d, <i>J</i> = 7.1 Hz, 3H)              | 0.92 (d, <i>J</i> = 7.1 Hz, 3H)                     | 0.94 (d, <i>J</i> = 7.1 Hz, 3H)                      |
| 0.88 (s, 3H)                                 | 0.84 (s, 3H)                                        | 0.85 (s, 3H)                                         |
| 0.86 (d, <i>J</i> = 6.9 Hz, 3H)              | 0.82 (d, <i>J</i> = 7.0 Hz, 1H)                     | 0.85 (d, <i>J</i> = 7.1 Hz, 3H)                      |

#### <sup>13</sup>C NMR

| Synthetic<br>(125 MHz, CDCl <sub>3</sub> ) | Isolated <sup>i</sup><br>(125 MHz, CDCl <sub>3</sub> ) | Isolated <sup>ii</sup><br>(125 MHz, CDCl <sub>3</sub> ) |
|--------------------------------------------|--------------------------------------------------------|---------------------------------------------------------|
| 145.4                                      | 145.5                                                  | 145.4                                                   |
| 114.2                                      | 114.2                                                  | 114.2                                                   |
| 68.2                                       | 68.1                                                   | 68.1                                                    |
| 67.1                                       | 67.1                                                   | 67.1                                                    |
| 61.6                                       | 61.7                                                   | 61.6                                                    |
| 49.1                                       | 49.1                                                   | 49.0                                                    |
| 40.1                                       | 40.1                                                   | 40.1                                                    |
| 34.4                                       | 34.4                                                   | 34.3                                                    |
| 31.1                                       | 31.1                                                   | 31.0                                                    |
| 29.7                                       | 29.8                                                   | 29.7                                                    |
| 26.4                                       | 26.5                                                   | 26.4                                                    |
| 21.3                                       |                                                        |                                                         |

|      |      |      |
|------|------|------|
| 20.9 | 21.3 | 21.3 |
| 18.1 | 20.9 | 20.9 |
| 16.2 | 18.1 | 18.0 |
|      | 16.3 | 16.2 |

### Optical rotation

| Synthetic                                                                        | Isolated <sup>i</sup>                                                            | Isolated <sup>ii</sup>                                                          |
|----------------------------------------------------------------------------------|----------------------------------------------------------------------------------|---------------------------------------------------------------------------------|
| $[\alpha]_{\text{D}}^{25} +33.2^{\circ}$<br>( <i>c</i> 0.41, CHCl <sub>3</sub> ) | $[\alpha]_{\text{D}}^{20} +36.5^{\circ}$<br>( <i>c</i> 0.32, CHCl <sub>3</sub> ) | $[\alpha]_{\text{D}}^{20} -88.0^{\circ}$<br>( <i>c</i> 0.6, CHCl <sub>3</sub> ) |

- 
- i. Zhang, H.-J.; Tan, G. T.; Santarsiero, B. D.; Mesecar, A. D.; Hung, N. V.; Cuong, N. M.; Soejarto, D. D.; Pezzuto, J. M.; Fong, H. H. S. *J. Nat. Prod.* **2003**, *66*, 609–615.
- ii. Sun, Z.; Chen, B.; Zhang, Z.; Hu, C. *J. Nat. Prod.* **2004**, *67*, 1975–1979.
